# Supplementary material for: Prevalence and predictors of gestational diabetes mellitus in rural Assam: a cross-sectional study using mobile medical units
Source: PubMed Central journal article supplement — BMJ Open. 2020 Nov 10;10(11):e037836. doi: 10.1136/bmjopen-2020-037836 (PMC7656912; doi:10.1136/bmjopen-2020-037836), 2020-11-10
Supplement: bmjopen-2020-037836.draft_revisions.pdf [file bmjopen-2020-037836.draft_revisions.pdf]

# BMJ Open

BMJ Open is committed to open peer review. As part of this commitment we make the peer review history of every article we publish publicly available.

When an article is published we post the peer reviewers' comments and the authors' responses online. We also post the versions of the paper that were used during peer review. These are the versions that the peer review comments apply to.

The versions of the paper that follow are the versions that were submitted during the peer review process. They are not the versions of record or the final published versions. They should not be cited or distributed as the published version of this manuscript.

BMJ Open is an open access journal and the full, final, typeset and author-corrected version of record of the manuscript is available on our site with no access controls, subscription charges or pay-per-view fees (<http://bmjopen.bmj.com>).

If you have any questions on BMJ Open's open peer review process please email [info.bmjopen@bmj.com](mailto:info.bmjopen@bmj.com)

# BMJ Open

## Prevalence and predictors of Gestational Diabetes Mellitus in rural Assam: A cross-sectional study using mobile medical units

|                               |                                                                                                                                                                                                                                                                                                                                                                                                                                                                         |
|-------------------------------|-------------------------------------------------------------------------------------------------------------------------------------------------------------------------------------------------------------------------------------------------------------------------------------------------------------------------------------------------------------------------------------------------------------------------------------------------------------------------|
| Journal:                      | <i>BMJ Open</i>                                                                                                                                                                                                                                                                                                                                                                                                                                                         |
| Manuscript ID                 | bmjopen-2020-037836                                                                                                                                                                                                                                                                                                                                                                                                                                                     |
| Article Type:                 | Original research                                                                                                                                                                                                                                                                                                                                                                                                                                                       |
| Date Submitted by the Author: | 19-Feb-2020                                                                                                                                                                                                                                                                                                                                                                                                                                                             |
| Complete List of Authors:     | Chanda, Subrata; Piramal Healthcare Limited, Clinical Domain<br>Dogra, Vishal; Piramal Healthcare Limited, Research and Analysis<br>Hazarika, Najeeb; Piramal Healthcare Limited, Assam and North East<br>State Office<br>Bambrah, Hardeep; Piramal Healthcare Limited, Operations<br>Sudke, Ajit; Piramal Healthcare Limited, Clinical Domain<br>Vig, Anupa; Piramal Healthcare Limited, Clinical Domain<br>Hegde, Shailendra; Piramal Healthcare Limited, Innovations |
| Keywords:                     | Diabetes in pregnancy < DIABETES & ENDOCRINOLOGY,<br>EPIDEMIOLOGY, PRIMARY CARE                                                                                                                                                                                                                                                                                                                                                                                         |
|                               |                                                                                                                                                                                                                                                                                                                                                                                                                                                                         |

SCHOLARONE™  
Manuscripts

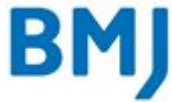

I, the Submitting Author has the right to grant and does grant on behalf of all authors of the Work (as defined in the below author licence), an exclusive licence and/or a non-exclusive licence for contributions from authors who are: i) UK Crown employees; ii) where BMJ has agreed a CC-BY licence shall apply, and/or iii) in accordance with the terms applicable for US Federal Government officers or employees acting as part of their official duties; on a worldwide, perpetual, irrevocable, royalty-free basis to BMJ Publishing Group Ltd ("BMJ") its licensees and where the relevant Journal is co-owned by BMJ to the co-owners of the Journal, to publish the Work in this journal and any other BMJ products and to exploit all rights, as set out in our [licence](#).

The Submitting Author accepts and understands that any supply made under these terms is made by BMJ to the Submitting Author unless you are acting as an employee on behalf of your employer or a postgraduate student of an affiliated institution which is paying any applicable article publishing charge ("APC") for Open Access articles. Where the Submitting Author wishes to make the Work available on an Open Access basis (and intends to pay the relevant APC), the terms of reuse of such Open Access shall be governed by a Creative Commons licence – details of these licences and which [Creative Commons](#) licence will apply to this Work are set out in our licence referred to above.

Other than as permitted in any relevant BMJ Author's Self Archiving Policies, I confirm this Work has not been accepted for publication elsewhere, is not being considered for publication elsewhere and does not duplicate material already published. I confirm all authors consent to publication of this Work and authorise the granting of this licence.

1  
2  
3 **Prevalence and predictors of Gestational Diabetes Mellitus in rural Assam: A cross-**  
4 **sectional study using mobile medical units**  
5  
6  
7  
8  
9

10 **Subrata Chanda<sup>1</sup>, Vishal Dogra<sup>2</sup>, Najeeb Hazarika<sup>1</sup>, Hardeep Bambrah<sup>1</sup>, Ajit Kisanrao**  
11 **Sudke<sup>3</sup>, Anupa Vig<sup>3</sup>, Shailendra Kumar Hegde<sup>4</sup>**  
12  
13  
14  
15

16 **Corresponding Author:** Vishal Dogra, Research and Analytics, Piramal Swasthya  
17 Management and Research Institute, Plot no. 120, 5<sup>th</sup> Floor, Srinagar Colony, Hyderabad,  
18 India; Email: [vani1825@gmail.com](mailto:vani1825@gmail.com); Tel: +9140-49451999  
19  
20  
21  
22

23 <sup>1</sup>Assam and North East State Office, Piramal Swasthya Management and Research Institute,  
24 Guwahati, India  
25

26 <sup>2</sup>Research and Analytics, Piramal Swasthya Management and Research Institute, Hyderabad,  
27 India  
28

29 <sup>3</sup>Clinical Domain, Piramal Swasthya Management, and Research Institute, Hyderabad,  
30 Telangana, India  
31

32 <sup>4</sup>Department of Innovations, Piramal Swasthya Management and Research Institute,  
33 Hyderabad, India  
34  
35  
36  
37

38 **Word count** (Excluding title page, abstract, references, figures and tables)- **3007**  
39

40 **Key Words:** Gestational Diabetes Mellitus, Assam, Mobile Medical Unit, OGTT  
41  
42  
43  
44  
45  
46  
47  
48  
49  
50  
51  
52  
53  
54  
55  
56  
57  
58  
59  
60

## ABSTRACT

**Objective** To determine the prevalence and predictors of Gestational Diabetes Mellitus (GDM) in rural Assam, India using a network of Mobile Medical Units

**Study Design** A field-based cross-sectional study

**Settings** Rural areas of Assam state, India

**Participants** A total of 1410 pregnant women in gestational age of 24-28 weeks

**Intervention** Identification of pregnant women in 24-28 weeks of pregnancy from villages and administering them oral glucose tolerance test for Gestational Diabetes Mellitus confirmation.

**Primary and secondary outcome measures** Presence of gestational diabetes among pregnant women, risk factors, and predictors of Gestational Diabetes Mellitus.

**Results** A total of 1212 pregnant women underwent the oral glucose tolerance test. One hundred and ninety-eight women were ineligible due to existing chronic diseases or very high blood glucose level before the test. The overall GDM prevalence in Assam was 16.67% (95% CI 14.61-18.89%). Women aged 26-30 years (aOR 1.70; CI 1.14-2.52), who passed 10th class (aOR 1.58; CI 1.05-2.37), belonging to Muslim religion (aOR 1.52; 95% CI 1.05-2.21), and above poverty line (aOR 1.38; 95% CI 1.00-1.91) had significantly increased likelihood of developing GDM compared to respective baseline groups ( $p < 0.05$ ). Body mass index, gravida, and being non-anaemic were non-significant risk factors for GDM. Family history of diabetes (aOR 1.82; 95% CI 1.08-3.06), and smoking (aOR 1.61; 95% CI 1.10-2.35) were significant and independent predictors of GDM.

**Conclusion** The prevalence of gestational diabetes mellitus in rural Assam is high. The mobile medical units may play a significant role in the implementation of GDM screening, diagnosis, treatment to ensure better maternal and foetal health outcomes in rural Assam.

### Strengths and limitations of this study

1. The study used a representative sample of all eligible pregnant women in rural Assam
2. All eligible pregnant women underwent blood glucose estimation before initiating the oral glucose tolerance test
3. A standardised gold standard oral glucose tolerance test confirmed the presence of gestational diabetes mellitus among pregnant women
4. We could neither obtain a venous blood sample of pregnant women for glucose estimation nor test the blood glucose level early in pregnancy due to operational constraints

For peer review only

## BACKGROUND

Glucose intolerance or high blood sugar detected for the first time during pregnancy is known as Gestational Diabetes Mellitus (GDM).<sup>1</sup> Worldwide GDM is a significant public health problem.<sup>2</sup> GDM not only leads to adverse foetal health outcomes in the form of neonatal jaundice, stillbirths, macrosomia but also affects maternal health.<sup>3</sup> The GDM associated maternal complications include preeclampsia, the need for caesarean section, and respiratory distress.<sup>4</sup> Even GDM mother's risk of developing diabetes is up by 10% immediately after delivery. Evidence suggests that children born to GDM mothers are nearly four to eight times more likely to develop diabetes in later life compared to their siblings born to the same parent with no GDM.<sup>5</sup>

GDM affects about four million women in India. The prevalence of GDM in the Indian population is high compared to other Asian countries. At any point in time, The GDM prevalence ranges from 6 to 9% in rural and 12 to 21% in the urban areas.<sup>6-8</sup>

The Government of India guidelines mandates age-appropriate GDM screening of pregnant women at primary health centres during regular antenatal check-ups (ANC).<sup>9</sup> However, due to infrequent glucose and insulin supply, and the non-availability of healthcare staff at primary public health facilities in most of the Indian states, GDM screening is not a regular part of ANC visits, results of which rural pregnant women are not timely screened and in some cases, leads to misdiagnosis of GDM among suspected pregnant women.<sup>10,11</sup>

The public health facilities and their problems are no different in the north-eastern Indian state of Assam. Issues like hilly and challenging terrain, poor health infrastructure, and acute shortage of medical doctors at peripheral public health facilities contribute to inadequate or non-implementation of different government health schemes including GDM screening.<sup>12,13</sup> Therefore, reliable GDM data and estimations for rural Assam are inadequately studied. A few research studies, with a limited sample, documented GDM prevalence in scattered rural geography of Assam but all such estimates are from hospital-based studies and lack generalizability.

The state government of Assam runs a large Mobile Medical Unit (MMU) program to deliver basic primary health services to its rural population. The vast network of MMUs allows us not only to study the pattern of healthcare morbidities among program beneficiaries but provide a platform to routinely report and derive the population-based estimates on key health conditions.<sup>14,15</sup> Evidence also suggests that MMUs are useful in screening of diseases

1  
2  
3 like tuberculosis, breast cancer, HIV, hepatitis.<sup>16-18</sup> Hence, we take the opportunity to  
4 leverage the MMU platform to reach and screen eligible pregnant women in rural Assam. We  
5 aim to determine the prevalence and associated risk factors of GDM in rural Assam.  
6  
7

## 8 9 **METHODS**

10  
11 We did a cross-sectional study in rural Assam. We divided the state into five zones. Using  
12 multi-stage sampling, pregnant women in the gestational age of 24-28 weeks were identified.  
13 All eligible pregnant women were reached through MMUs in each zone and screened for  
14 GDM using the oral glucose tolerance test (OGTT) irrespective of fasting status.  
15  
16  
17

### 18 19 **Study Design**

20  
21 Cross-sectional study.  
22

### 23 24 **Setting and Participants**

25  
26 The north-eastern state of Assam has a population of 30.12 million with 993 females per  
27 1000 males.<sup>19</sup> As per recent rural health statistics, Assam has a shortfall of 21 % of Sub-  
28 Centres (SCs), 1 % of Primary Health Centres (PHCs) and 28 % of Community Health  
29 Centres(CHCs) against the sanctioned numbers.<sup>20</sup> Access to 15% of sub-centres and 3.1% of  
30 PHCs is difficult due to the unavailability of roads. Nearly 16.8% SCs are beyond 3  
31 kilometres radius of villages and 31.7% of PHCs are beyond 10 km radius of villages.<sup>21</sup>  
32 People in rural Assam depends heavily on public health services (82.7%). As of 2015-17,  
33 Assam has the highest Maternal Mortality Ratio (MMR) in the country at 229 deaths per 100  
34 000 live birth compared to India's MMR of 122. The state reports high Infant Mortality Rate  
35 (44/1000 live births) compared to national averages (33/1000 live births). The incidence of  
36 non-communicable diseases is rising, especially diabetes and hypertension. As per National  
37 Family Health Survey-4, 5.2% women and 6.6% men have high blood sugar levels; 11.8 %  
38 women and 15.1% men have raised blood pressure.<sup>22,23</sup>  
39  
40  
41  
42  
43  
44  
45  
46  
47  
48

### 49 50 **The MMU Program Description**

51  
52 The MMU program, known as "Sanjeevani," in Assam state, is a public-private partnership  
53 between the Government of Assam and Piramal Swasthya Management and Research  
54 Institute (PSMRI). The program scope is to provide promotive, preventive, curative and  
55 referral services to villagers at their doorstep for non-emergency primary health conditions  
56  
57  
58  
59  
60



such as seasonal illnesses and common diseases. The state government provides funds while PSMRI implements field services and run program operations.

Sanjeevani is a nurse-led MMU program, having a fleet of 78 MMUs, and covers nearly 3744 (14.4%) of all villages (26,000) across Assam state. Each MMU has a nurse, pharmacist, laboratory technician and a registration and measurement officer (RMO). Every MMU follows a fixed day service delivery schedule and visit a particular village once in a month for delivering health services.

The program, for its operations, operates in five distinct zones of the state. Table 1 summarises the details of each zone and the numbers of MMUs. For study purpose, we refer to each zone as a cluster.

**Table 1: Zone and District wise distributions of MMUs in rural Assam**

| Zones   | Name of the districts                                          | Districts (#) | MMUs (#) |
|---------|----------------------------------------------------------------|---------------|----------|
| North   | Sonitpur, Dhemaji, Lakhimpur, Darrang, Nagaon                  | 5             | 15       |
| South   | Cachar, Karimganj, Hailakandi, NC Hills                        | 4             | 17       |
| East    | Tinsukia, Dibrugarh, Jorhat, Karbi angling, Golaghat, Sivsagar | 6             | 17       |
| West    | Bongaigaon, Kokrajhar, Dhubri, Barpeta, Chirang, Goalpara      | 6             | 17       |
| Central | Kamrup, Udalguri, Baksa, Nalbari, Morigaon                     | 5             | 12       |

### Study Duration

Data were collected between July 2019 and September 2019.

### Outcome Variable

The presence or absence of GDM among pregnant women confirmed through OGTT is the primary study outcome.

### Independent variables

Sociodemographic variables (age, religion, education, economic status), body mass index (BMI), blood pressure (systolic and diastolic), gravida status (primi and multigravida), haemoglobin levels (for anaemia status), family history of diabetes, miscarriage history, alcohol, and tobacco use. The measurements of height, weight, and blood pressure were taken through the standardized and calibrated equipment as per the WHO STEPS manual.<sup>24</sup>

## Sample Size

We calculated a minimum sample of 150 for each cluster considering the expected proportion of GDM 7%, absolute precision 5%, design defect 1.5, and a 95% confidence interval.

We randomly selected 50% of the MMUs from each cluster. An MMU, on average, covers 48 villages (service delivery points) every month. From each cluster, we randomly selected 30 villages, using a probability proportional to size method. Next, we line listed all pregnant women in the gestational age of 24-28 weeks in the selected villages. However, to extend the benefit of GDM screening, all eligible women in 24-28 weeks of pregnancy were included in the study in the sampled villages. The random selection of MMUs, and villages was done through a random numbers table. Figure 1 depicts the sampling methodology

## Inclusion and Exclusion Criteria

All pregnant women in the gestational age of 24 – 28 weeks were included. Pregnant women with known history of diabetes mellitus or GDM and other chronic illnesses such as cancer, hypertension, asthma, epilepsy, arthritis were excluded from the study. Pregnant women with blood random glucose level >200 mg/dl before initiating OGTT were also excluded.

## GDM Screening-The Oral Glucose Tolerance Test(OGTT)

The study followed Diabetes In Pregnancy Study group India (DIPSI) guidelines endorsed by the Government of India for the diagnosis of GDM (2018), irrespective of the fasting status. A blood sugar level of 140 mg/dL (7.8 mmol/L) or higher at 2 hours after ingestion of 75gm glucose indicates GDM.<sup>9,25</sup>

All diagnosed positive cases were referred to the Primary Health Centre(PHC) Medical Officer (MO) to start the treatment immediately.

## Data Collection

The first step involved line listing of all 24-28 weeks gestation pregnant women in the selected villages. We used government provided “Mother and Child Protection Card” issued to every pregnant mother to ascertain the last date of menstrual period and eligibility. In the next step, we identified a PHC nearest to at least two selected villages. Eligible pregnant women from these villages were then mobilised by a village health worker (Accredited Social Health Activist-ASHA) to a pre-identified PHC. At PHC, two MMUs were on standby.

1  
2  
3 Paramedical staff from one MMU helped PHC doctor in administering the OGTT and  
4 recording the results along with capturing other information using a data tool (**Annexure 1**).  
5  
6 The other MMU was used to transport all identified pregnant women to and from their  
7  
8 homes.  
9

10 We incentivised ASHAs @\$0.70 (INR 50) per pregnant woman for mobilising a pregnant  
11 woman to respective health facilities. The presence of a MO helped in managing any  
12 emergency and initiating immediate treatment for GDM positive cases.  
13  
14

15  
16 Data were collected from July-Sept 2019 using a survey tool.  
17  
18

### 19 **Data Analysis**

20  
21 Primary data were entered into excel and imported into STATA (version 15.1) for further  
22 analysis.<sup>25</sup> Categorical data were presented as percentages (%) and Pearson's Chi-square test  
23 was used to evaluate the difference in proportions. Logistic regression method established the  
24 independent associations between the outcome and the predictor variable giving odds ratios,  
25 95% confidence intervals and p-values.  
26  
27  
28  
29

### 30 **Patient and public involvement**

31  
32 No patient or public members were involved in the design and execution of this study.  
33  
34

### 35 **Ethical Considerations**

36  
37 Piramal Swasthya Management and Research Institute's institutional research ethics  
38 committee approved the study (letter no. PSMRI/2019/11 dated 11<sup>th</sup> May 2019). In addition,  
39 we took administrative approval from the Government of Assam for smooth field operations.  
40 Research participants were told the purpose of the study and provided written informed  
41 consent.  
42  
43  
44  
45

### 46 **RESULTS**

47  
48 A total of 1410 women were eligible for the study of which 198 pregnant were suffering from  
49 chronic illnesses including diabetes or blood glucose level >200 mg/dl before initiating  
50 OGTT, hence were excluded. We report the analysis of eligible 1212 pregnant women who  
51 underwent the OGTT.  
52  
53  
54  
55

56  
57 The mean age of the study sample was 23.7 years (SD ± 4.20) years. More than two-thirds  
58 (70%) women were in 15-25 years age group. More than half (55%) were Hindu, educated up  
59  
60

to primary level (50%), and belonging to below poverty line (74%). Nearly one third (32%) had abnormal BMI and very few were hypertensive (3%). More than half (51%) were already having three or more children. A large proportion of women were anaemic (83%). A few women reported a family history of diabetes (6%) or abortion (7%) in their previous pregnancy. A few pregnant women were smokers (2%) (Table 2).

**Table 2: Basic characteristics of Pregnant Women according to GDM status in Rural Assam (2019)**

| Variable                           | GDM (-)<br>N= 1010 (%) | GDM (+)<br>N=202 (%) | Total<br>N=1212 (%) |
|------------------------------------|------------------------|----------------------|---------------------|
| <b>Age (Mean±SD)</b>               | 23.5 (4.04)            | 24.4 (4.6)           | 23.7 (4.2)          |
| <b>Age Categories</b>              |                        |                      |                     |
| 15-20 Years                        | 291 (29)               | 51 (25)              | 342 (28)            |
| 21-25 Years                        | 437 (43)               | 71 (35)              | 508 (42)            |
| 26-30 Years                        | 235 (23)               | 63 (31)              | 298 (25)            |
| >30 Years                          | 47 (5)                 | 17 (8)               | 64 (5)              |
| <b>Religion</b>                    |                        |                      |                     |
| Hindu                              | 566 (56)               | 102 (51)             | 668 (55)            |
| Muslim                             | 433 (43)               | 99 (49)              | 532 (44)            |
| Christian                          | 11 (1)                 | 1 (1)                | 12 (1)              |
| <b>Education</b>                   |                        |                      |                     |
| Illiterate                         | 71 (7)                 | 10 (5)               | 81 (7)              |
| Primary School                     | 516 (51)               | 93 (46)              | 609 (50)            |
| 10th Pass                          | 234 (23)               | 53 (26)              | 287 (24)            |
| 12th Pass                          | 136 (14)               | 31 (15)              | 167 (14)            |
| Graduate and above                 | 53 (5)                 | 15 (7)               | 68 (6)              |
| <b>Economic Status</b>             |                        |                      |                     |
| Above Poverty Line                 | 247 (24)               | 68 (34)              | 315 (26)            |
| Below Poverty Line                 | 763 (76)               | 134 (66)             | 897 (74)            |
| <b>Body Mass Index</b>             |                        |                      |                     |
| Normal                             | 700 (69)               | 125 (62)             | 825 (68)            |
| Underweight                        | 194 (19)               | 43 (21)              | 237 (20)            |
| Overweight/Obese                   | 116 (12)               | 34 (17)              | 150 (12)            |
| <b>Blood Pressure levels</b>       |                        |                      |                     |
| Normal                             | 681 (67)               | 138 (68)             | 819 (68)            |
| Prehypertension                    | 300 (30)               | 54 (27)              | 354 (29)            |
| Hypertension                       | 29 (3)                 | 10 (5)               | 39 (3)              |
| <b>Gravida Status</b>              |                        |                      |                     |
| Primigravida                       | 499 (49)               | 97 (48)              | 596 (49)            |
| Multigravida                       | 511 (51)               | 105 (52)             | 616 (51)            |
| <b>Anaemia (Y)</b>                 | 846 (84)               | 156(77)              | 1,002 (83)          |
| <b>Diabetes Family History (Y)</b> | 51 (5)                 | 24 (12)              | 75 (6)              |
| <b>Miscarriage History (Y)</b>     | 70 (7)                 | 19 (9)               | 89 (7)              |
| <b>Current Smoker (Y)</b>          | 21 (2)                 | 8 (4)                | 29 (2)              |

**Table 3: Prevalence of GDM (Zone wise) in rural Assam, (2019)**

| Zone         | N           | GDM Prevalence (%) | 95% CI    | P-value |
|--------------|-------------|--------------------|-----------|---------|
| North        | 218         | 18.4               | 13.7-24.1 | 0.18    |
| South        | 253         | 15.0               | 11.1-20.0 |         |
| Central      | 282         | 20.6               | 16.2-25.7 |         |
| East         | 194         | 12.9               | 8.8-18.4  |         |
| West         | 265         | 15.5               | 11.6-20.3 |         |
| <b>Total</b> | <b>1212</b> | <b>16.7</b>        |           |         |

North (Sonitpur, Dhemaji, Lakhimpur, Darrang, Nagaon), South (Cachar, Karimganj, Hailakandi, N C Hills), Central (Kamrup, Udalguri, Baksa, Nalbari, Morigaon), East (Tinsukia, Dibrugarh, Jorhat, Karbi angling, Golaghat), West (Bongaigaon, Kokrajhar, Dhubri, Barpeta, Chirang, Goalpara)

The GDM prevalence in rural Assam is 16.7% (range 12.9-20.6%). The central zone has a higher GDM prevalence (20.6%) compared to the other four zones (North-18.4%; South-15.0%; East-12.9%; West-15.5%). (Table 3).

We found an increased likelihood of GDM with increasing age. Pregnant women (aged 26-30 years) were 1.7 times [adjusted odds ratio (aOR); 95% Confidence Interval (CI)] (aOR 1.7; 95% CI 1.14-2.52) more likely to have GDM compared to younger women (15-20 years) (p=0.01). Women who passed 10<sup>th</sup> class (aOR 1.58; CI 1.05-2.37), belonging to Muslim religion (aOR 1.52; 95% CI 1.05-2.21), and above poverty line (aOR 1.38; 95% CI 1.00-1.91) had significantly increased likelihood of developing GDM compared to respective baseline groups (p<0.05). Gravida status, BMI, and being non-anaemic were non-significant risk factors for GDM. Family history of diabetes (aOR 1.82; 95% CI 1.08-3.06), and smoking (aOR 1.61; 95% CI 1.10-2.35) were significant and independent predictors of GDM (Table 4).

**Table 4: Crude and adjusted Odds Ratios (with Confidence Intervals) of GDM in relation to other predictor variables**

| Variable         | Unadjusted          |         | Adjusted            |         |
|------------------|---------------------|---------|---------------------|---------|
|                  | Odds Ratio (95% CI) | P-value | Odds Ratio (95% CI) | P-value |
| <b>Age</b>       |                     |         |                     |         |
| 15-20 years      | 1.00                |         | 1.00                |         |
| 21-25 years      | 0.93 (0.63-1.37)    | 0.70    | 1.00 (0.54-1.84)    | 0.99    |
| *26-30 years     | 1.53 (1.02-2.30)    | 0.04    | 1.70 (1.14-2.52)    | 0.01    |
| > 30 years       | 2.06 (1.10-3.87)    | 0.02    | 2.33 (0.78-6.95)    | 0.13    |
| <b>Education</b> |                     |         |                     |         |
| Illiterate       | 1.00                |         | 1.00                |         |

1  
2  
3  
4  
5  
6  
7  
8  
9  
10  
11  
12  
13  
14  
15  
16  
17  
18  
19  
20  
21  
22  
23  
24  
25  
26  
27  
28  
29  
30  
31  
32  
33  
34  
35  
36  
37  
38  
39  
40  
41  
42  
43  
44  
45  
46  
47  
48  
49  
50  
51  
52  
53  
54  
55  
56  
57  
58  
59  
60

|                            |                  |      |                  |      |
|----------------------------|------------------|------|------------------|------|
| Primary School             | 1.28 (0.64-2.57) | 0.49 | 1.28 (0.52-3.16) | 0.58 |
| *10th Pass                 | 1.61(0.78-3.32)  | 0.20 | 1.58(1.05-2.37)  | 0.03 |
| 12th Pass                  | 1.62(0.75-3.49)  | 0.22 | 1.41 (0.94-2.11) | 0.10 |
| Graduate and above         | 2 (0.84-4.82)    | 0.12 | 1.47 (0.62-3.48) | 0.38 |
| <b>Religion</b>            |                  |      |                  |      |
| Hindu                      | 1.00             |      | 1.00             |      |
| *Muslim                    | 1.27 (0.94-1.72) | 0.12 | 1.52 (1.05-2.21) | 0.03 |
| Christian                  | 0.5 (0.06-3.95)  | 0.52 | 0.70 (0.14-3.45) | 0.66 |
| <b>Economic status</b>     |                  |      |                  |      |
| Below Poverty Line (BPL)   | 1.00             |      | 1.00             |      |
| *Above Poverty Line (APL)  | 1.56 (1.13-2.17) | 0.01 | 1.38 (1.00-1.91) | 0.05 |
| <b>Body Mass Index</b>     |                  |      |                  |      |
| Normal                     | 1.00             |      | 1.00             |      |
| Underweight                | 1.24 (0.85-1.82) | 0.27 | 1.35 (0.93-1.96) | 0.11 |
| Overweight/Obese           | 1.64 (1.07-2.51) | 0.02 | 1.38 (0.90-2.10) | 0.13 |
| <b>Gravida</b>             |                  |      |                  |      |
| Multigravida               | 1.00             |      | 1.00             |      |
| Primigravida               | 0.95 (0.70-1.28) | 0.72 | 1.27 (0.84-1.92) | 0.25 |
| <b>Haemoglobin Status</b>  |                  |      |                  |      |
| Anaemic                    | 1.00             |      | 1.00             |      |
| Non-Anaemic                | 1.52 (1.05-2.20) | 0.03 | 1.46 (0.94-2.26) | 0.09 |
| <b>Diabetes in Family</b>  |                  |      |                  |      |
| No                         | 1.00             |      | 1.00             |      |
| *Yes                       | 2.53 (1.52-4.22) | 0.00 | 1.82 (1.08-3.06) | 0.02 |
| <b>Miscarriage History</b> |                  |      |                  |      |
| No                         | 1.00             |      | 1.00             |      |
| Yes                        | 1.4 (0.82-2.37)  | 0.22 | 1.53 (0.93-2.52) | 0.09 |
| <b>Smoking Status</b>      |                  |      |                  |      |
| Non-smokers                | 1.00             |      | 1.00             |      |
| *Current Smokers           | 1.94 (0.85-4.45) | 0.13 | 1.61 (1.10-2.35) | 0.01 |

Estimates were calculated using logistic regression with a robust cluster estimator of the variance in stata 15.1. The clustered standard error estimated with clustering at the zone level. \* Significant variable in multivariate logistic regression

## DISCUSSION

Using a network of mobile medical units in rural Assam, we derived not only the first-hand estimates of GDM prevalence and its relationship with sociodemographic and other risk but

1  
2  
3 also assessed the feasibility of GDM screening in the community settings. In our study, the  
4 basic characteristics of GDM mothers and non-GDM mothers did not vary significantly (not  
5 shown in results) except for age, BMI, economic status and family history of diabetes.  
6  
7

8  
9 The study sample consists of pregnant young, literate, Hindu and Muslim females which  
10 correspond to the latest population statistics of the state.<sup>26</sup> We found GDM prevalence of  
11 16.7% in rural Assam (range- 12.9 to 20.6%). Education (10th pass), age (26 to 30 years),  
12 religion (Muslim), socio-economic status (above the poverty line), tobacco use (currently  
13 smokers) and past history (family history of diabetes) were the significant primary predictors  
14 of GDM in rural Assam. The GDM prevalence estimates, as found in our study, in rural  
15 Assam, are high compared to international and national evidence. For example, studies from  
16 Bangladesh, Egypt, and Ethiopia reported prevalence rates of 9.7%, 8.0%, and 7.7%  
17 respectively.<sup>27-29</sup> Likewise, GDM prevalence ranges from 6 to 9% in rural India and remain  
18 high for rural Assam.<sup>7,8,30-33</sup> It is imperative to state that majorities of the Indian evidence  
19 come from studies done in North and South India. Studies from northeast India are scarce and  
20 primarily done under hospital settings. Evidence from these studies reports a low prevalence  
21 of GDM in the northeast region (Assam 3%, Manipur 0-1%,) compared to other states  
22 (Jammu and Kashmir 3.8-11%; Maharashtra 0.5-9.5%; Andhra Pradesh 17.20-21.81%; and  
23 Uttar Pradesh 13.38-41.87%). Similarly, studies from rural and urban India found a  
24 considerable variation in GDM prevalence in rural (0.5-13.9%) and urban areas (0.56-41.9%)  
25 respectively.<sup>8,34,35</sup>  
26  
27  
28  
29  
30  
31  
32  
33  
34  
35  
36  
37  
38

39 Geographically, the central zone districts had the highest GDM prevalence among all study  
40 zones. The geographical differences in prevalence in different regions are due to differences  
41 in the demographic and socioeconomic status of pregnant women in these regions.<sup>31</sup> Studies  
42 show that the likelihood of GDM among pregnant women increases with increasing maternal  
43 age, and BMI. Particularly mothers aged 25 years or more have increased risk of GDM and  
44 the likelihood of GDM rises after 25 years of age. In our study, we found a similar trend  
45 finding a non-significant positive relationship between the two. Evidence around the world  
46 suggests maternal age and BMI as significant predictors for GDM.<sup>36-37</sup> However, in our  
47 study, pregnant women aged 26-30 years only had a significantly increased likelihood of  
48 GDM, while BMI had no significant association. Family history of diabetes and current  
49 smoking status were significant predictors of GDM and findings were similar as reported in  
50 other studies.<sup>29,38-39</sup> However, unlike other studies, our study did not find any significant  
51 association between GDM and hypertension.<sup>37,38</sup>  
52  
53  
54  
55  
56  
57  
58  
59  
60

1  
2  
3 Among GDM confirmed cases, a high fraction (34%) were from APL category compared to  
4 non-GDM APL women (24%). This result is inconsistent with other studies where low  
5 socioeconomic status emerges as a significant risk factor for the development of type 2  
6 diabetes mellitus.<sup>40,41</sup> This may also be due to the fact our study sample is from rural areas  
7 where monthly disposable income is less than the national or state averages.<sup>42</sup> Socioeconomic  
8 status and education had no significant effect on developing GDM which is in line with other  
9 studies finding no independent association between GDM, education and socioeconomic  
10 status.<sup>40, 43</sup> A higher proportion of pregnant women in our study were anaemic (83%). The  
11 rates of anaemia were disproportionately higher compared to state averages (45.7%) and as  
12 reported in a local study (72%) conducted in a rural block of Dibrugarh district of Assam  
13 state.<sup>22,41</sup> This could be explained to poor dietary habits and local food culture among  
14 pregnant women.<sup>42</sup> Further, we found an inverse relationship between anaemia and GDM  
15 adjusted for other variables and this finding aligns to as reported in other studies examining  
16 the association of GDM and anaemia.<sup>41</sup>

17  
18  
19  
20  
21  
22  
23  
24  
25  
26  
27  
28 Our study is an attempt to define GDM prevalence estimates in rural Assam. This was  
29 possible because of three factors (1) unique presence and positioning of an extensive network  
30 of MMUs in rural Assam reaching to far-flung remote areas (2) government ownership and  
31 support for carrying field data collection. Auxiliary Nurse Midwives and ASHAs helped  
32 identification and mobilization of pregnant women from the villages to respective MMU  
33 screening points located at public health facilities (3) presence of government MOs during  
34 screening helped in prompt treatment of GDM positive women and counselling support.  
35 Despite a large study, we faced certain definite challenges. First, due to resource constraints,  
36 we could not obtain a venous blood sample of pregnant women for glucose estimation.  
37 Secondly, maternal blood glucose estimation during the initial phase of pregnancy could not  
38 be assessed. This could have reinforced our findings. However, we tested maternal blood  
39 glucose before initiating OGTT. Additionally, we could not ascertain the reasons for the  
40 association of above poverty line pregnant women with GDM due to unavailability of data.  
41 Further research is needed on this. However, despite its limitations, our study used a  
42 representative sample of all eligible pregnant women in rural Assam. A standardised gold  
43 standard oral glucose tolerance test confirmed the presence of GDM among pregnant women.  
44 In summary, MMUs are increasingly becoming an essential component in resource-  
45 constrained health systems. Such a unique model of healthcare service delivery not only  
46 reach the difficult and underserved areas but has the potential to screen communicable and  
47  
48  
49  
50  
51  
52  
53  
54  
55  
56  
57  
58  
59  
60



1  
2  
3 non-communicable conditions and linking beneficiaries with the local healthcare for timely  
4 and prompt health interventions.<sup>43</sup>  
5  
6

## 7 **CONCLUSIONS**

8  
9 Our study gives first-hand estimates of GDM prevalence in rural Assam. A high prevalence  
10 of GDM in rural Assam warrants immediate government attention to safeguard the maternal  
11 and child health in the state. MMUs could be an option to initiate GDM screening in rural  
12 areas with appropriate compliance to guidelines and sufficient resource allocation.  
13  
14  
15  
16

### 17 **Funding**

18  
19 This work was supported by World Diabetes Foundation [Project-number WDF 15-956].  
20  
21

### 22 **Declaration of interests**

23  
24 We declare no competing interests  
25  
26

### 27 **Data availability statement**

28  
29 Data can be requested from the principal investigator citing a reasonable request.  
30  
31

### 32 **Contributors**

33  
34 SC, VD and SH conceptualised the study. NH and HB supervised the field operations and  
35 data collection. SC cleaned the field data and wrote the first draft paper. VD performed the  
36 statistical analysis, interpreted the results and wrote the final manuscript. SH, AS, AV  
37 supervised the data transcription, and reviewed and edited the manuscript. All authors  
38 approved the final version of the manuscript.  
39  
40  
41  
42

### 43 **Acknowledgements**

44  
45 World diabetes foundation for funding the study. Government of Assam for ensuring smooth  
46 field operations. All pregnant women who participated in the study and front-line health  
47 workers who helped to identify and mobilize pregnant women from their residences.  
48  
49  
50  
51  
52  
53  
54  
55  
56  
57  
58  
59  
60

**ORCID Ids of Authors**

Subrata Chanda <https://orcid.org/0000-0003-3427-4731>

Vishal Dogra <https://orcid.org/0000-0001-9725-5699>

Najeeb Hazarika <https://orcid.org/0000-0001-6778-6325>

Hardeep Bambhrah <https://orcid.org/0000-0002-9209-9743>

Ajit Sudke <https://orcid.org/0000-0001-7068-8478>

Anupa Vig <https://orcid.org/0000-0003-3074-3844>

Shailendra Hegde <https://orcid.org/0000-0002-8756-9085>

For peer review only

## References:

- 1 Catalano PM, McIntyre HD, Cruickshank JK, *et al.* The hyperglycemia and adverse pregnancy outcome study: Associations of GDM and obesity with pregnancy outcomes. *Diabetes Care* 2012; 35: 780–6.
- 2 Bhat M, Ramesha KN, Sarma SP, Menon S, Sowmini CV, Ganesh S. Determinants of gestational diabetes mellitus: A case control study in a district tertiary care hospital in south India. *Int J Diabetes Dev Ctries* 2010; 30: 91–6.
- 3 Crowther CA, Hiller JE, Moss JR, McPhee AJ, Jeffries WS, Robinson JS. Effect of treatment of gestational diabetes mellitus on pregnancy outcomes. *N Engl J Med* 2005; 352: 2477–86.
- 4 Buchanan TA, Xiang AH, Page KA. Gestational diabetes mellitus: Risks and management during and after pregnancy. *Nat Rev Endocrinol* 2012; 8: 639–49.
- 5 Damm P. Future risk of diabetes in mother and child after gestational diabetes mellitus. *Int J Gynaecol Obstet* 2009; 104 Suppl: S25-6.
- 6 Anjana RM, Deepa M, Pradeepa R, *et al.* Articles Prevalence of diabetes and prediabetes in 15 states of India: results from the ICMR-INDIAB population-based cross-sectional study. *LANCET Diabetes Endocrinol* 2017. DOI:10.1016/S2213-8587(17)30174-2.
- 7 Seshiah V, Balaji V, Balaji MS, *et al.* Prevalence of gestational diabetes mellitus in South India (Tamil Nadu) - A community based study. *J Assoc Physicians India* 2008; 56: 329–33.
- 8 Zargar AH, Sheikh MI, Bashir MI, *et al.* Prevalence of gestational diabetes mellitus in Kashmiri women from the Indian subcontinent. *Diabetes Res Clin Pract* 2004; 66: 139–45.
- 9 Maternal Health Division. Diagnosis & Management of Gestational Diabetes Mellitus Technical Guidelines. New Delhi, 2018  
[https://nhm.gov.in/New\\_Updates\\_2018/NHM\\_Components/RMNCH\\_MH\\_Guidelines/Gestational-Diabetes-Mellitus.pdf](https://nhm.gov.in/New_Updates_2018/NHM_Components/RMNCH_MH_Guidelines/Gestational-Diabetes-Mellitus.pdf) (accessed Feb 10, 2020).
- 10 Kasthuri A. Challenges to Healthcare in India - The Five A's. *Indian J Community Med* 2018; 43: 141–3.
- 11 Seshiah V, Balaji V, Balaji MS, Paneerselvam A, Kapur A. Pregnancy and diabetes scenario around the world: India. *Int J Gynecol Obstet* 2009. DOI:10.1016/j.ijgo.2008.11.035.
- 12 Saikia D, Das K. Access to Public Health-Care in the Rural Northeast India. *NEHU J* 2014; 12: 77–100.
- 13 Mahalakshmi MM, Bhavadharini B, Maheswari K, *et al.* Comparison of maternal and fetal outcomes among Asian Indian pregnant women with or without gestational diabetes mellitus: A situational analysis study (WINGS-3). *Indian J Endocrinol Metab* 2016; 20: 491–6.
- 14 Hill C, Zurakowski D, Bennet J, *et al.* Knowledgeable neighbors: A mobile clinic model for disease prevention and screening in underserved communities. *Am J Public Health* 2012; 102: 406–10.
- 15 Dogra V, Hegde S, Rathnam N, Emmadi S, Phanse V. Large Scale Mobile Medical Service Programme: Data Insights for strengthening local surveillance. *Online J Public Health Inform* 2019; 11. DOI:10.5210/ojphi.v11i1.9817.
- 16 Binopal G, Agarwal P, Kaur N, *et al.* Screening difficult-to-reach populations for tuberculosis using a mobile medical unit, Punjab India. *Public Heal Action* 2015; 5: 241–5.
- 17 Morano JP, Zelenev A, Lombard A, Marcus R, Gibson BA, Altice FL. Strategies for

- 1  
2  
3 Hepatitis C Testing and Linkage to Care for Vulnerable Populations: Point-of-Care  
4 and Standard HCV Testing in a Mobile Medical Clinic. *J Community Health* 2014; 39:  
5 922–34.  
6  
7 18 Greenwald ZR, Fregnani JH, Longatto-Filho A, *et al.* The performance of mobile  
8 screening units in a breast cancer screening program in Brazil. *Cancer Causes Control*  
9 2018; 29: 233–41.  
10  
11 19 Government of India, Registrar General & Census Commissioner I. Census of India  
12 2011: Population, Size and Decadal Change, Chapter 1. In: Census 2011. 2013: 561–3.  
13 20 Indian Institute of Population Sciences. District Level Household Facility Survey 4.  
14 Mumbai, 2013 <http://rchiips.org/DLHS-4.html> (accessed Jan 4, 2018).  
15 21 International Institute of Population Sciences. District Level Household and Facility  
16 Survey. Assam, 2010.  
17 22 International Institute for Population Sciences (IIPS) and ICF. Assam: NFHS 4 (2015 -  
18 16). 2015.  
19 23 Registrar General I. Sample Registration System. New Delhi, 2019  
20 [http://censusindia.gov.in/vital\\_statistics/SRS\\_Bulletins/SRS\\_Bulletin-Rate-2017-](http://censusindia.gov.in/vital_statistics/SRS_Bulletins/SRS_Bulletin-Rate-2017-)  
21 [\\_May\\_2019.pdf](http://censusindia.gov.in/vital_statistics/SRS_Bulletins/SRS_Bulletin-Rate-2017-May_2019.pdf) (accessed Sept 25, 2019).  
22 24 World Health Organization. The WHO STEPwise approach to noncommunicable  
23 disease risk factor surveillance (STEPS). Geneva  
24 [https://www.who.int/ncds/surveillance/steps/instrument/STEPS\\_Instrument\\_V3.2.pdf](https://www.who.int/ncds/surveillance/steps/instrument/STEPS_Instrument_V3.2.pdf)  
25 (accessed Feb 11, 2020).  
26 25 StataCorp. Stata Statistical Software: Release 13. College Station, TX: StataCorp LP.  
27 2013.  
28 26 Ministry of Home Affairs. Census of India Website : Office of the Registrar General  
29 & Census Commissioner, India. Dist. Census Handb. 2011.  
30 <http://censusindia.gov.in/2011census/dchb/Assam.html> (accessed Feb 11, 2020).  
31 27 Jesmin S, Akter S, Akashi H, *et al.* Screening for gestational diabetes mellitus and its  
32 prevalence in Bangladesh. *Diabetes Res Clin Pract* 2014; 103: 57–62.  
33 28 A. Khalil N. Screening for Gestational Diabetes Among Pregnant Women Attending a  
34 Rural Family Health Center- Menoufia Governorate- Egypt. *J Fam Med Heal Care*  
35 2017; 3: 6.  
36 29 Seyoum B, Kiros K, Haileselese T, Leole A. Prevalence of gestational diabetes  
37 mellitus in rural pregnant mothers in northern Ethiopia. *Diabetes Res Clin Pract* 1999;  
38 46: 247–51.  
39 30 Bhatt AA, Dhore PB, Purandare VB, Sayyad MG, Mandal MK, Unnikrishnan AG.  
40 Gestational diabetes mellitus in rural population of Western India - Results of a  
41 community survey. *Indian J Endocrinol Metab* 2015; 19: 507–10.  
42 31 Mithal A, Bansal B, Kalra S. Gestational diabetes in India: Science and society. *Indian*  
43 *J Endocrinol Metab* 2015; 19: 701–4.  
44 32 Rajput M, Bairwa M, Rajput R. Prevalence of gestational diabetes mellitus in rural  
45 Haryana: A community-based study. *Indian J Endocrinol Metab* 2014; 18: 350–4.  
46 33 Kalra P, Kachhwaha C, Singh H. Prevalence of gestational diabetes mellitus and its  
47 outcome in western Rajasthan. *Indian J Endocrinol Metab* 2013; 17: 677.  
48 34 Verma A, Singh B, Mengi V. Gestational diabetes in rural women of jammu. *Indian J*  
49 *Community Med* 2008; 33: 54–5.  
50 35 Li KT, Naik S, Alexander M, Mathad JS. Screening and diagnosis of gestational  
51 diabetes in India: a systematic review and meta-analysis. *Acta Diabetol* 2018; 55: 613–  
52 25.  
53 36 Erem C, Kuzu UB, Deger O, Can G. Prevalence of gestational diabetes mellitus and  
54 associated risk factors in Turkish women: The Trabzon GDM Study. *Arch Med Sci*  
55  
56  
57  
58  
59  
60

- 2015; 11: 724–35.
- 37 Fathy, Khalil NA, Mahmoud NS. Risk factors for gestational diabetes mellitus among pregnant women attending Monshaat Sultan Family Health Center, Menoufia Governorate. *Menoufia Med J* 2018; 31: 640.
- 38 Leng J, Shao P, Zhang C, *et al.* Prevalence of gestational diabetes mellitus and its risk factors in Chinese pregnant women: A prospective population-based study in Tianjin, China. *PLoS One* 2015; 10. DOI:10.1371/journal.pone.0121029.
- 39 Lao TT, Ho LF. Impact of Iron Deficiency Anemia on Prevalence of Gestational Diabetes Mellitus. *Diabetes Care* 2004; 27: 650–6.
- 40 Shen JJ, Tymkow C, MacMullen N. Disparities in maternal outcomes among four ethnic populations. *Ethn Dis* 2005; 15: 492–7.
- 41 Mahanta T, Deuri A, Mahanta B, *et al.* Maternal and foetal outcome of gestational diabetes mellitus in a rural block of Assam, India. *Clin Epidemiol Glob Heal* 2014; 2: 3–18.
- 42 Goswami RG, Thakur MB. Folk beliefs of food avoidance and prescription among menstruating and pregnant Karbi women of Kamrup district, Assam. *J Ethn Foods* 2019; 6: 19.
- 43 Binopal G, Agarwal P, Kaur N, *et al.* Screening difficult-to-reach populations for tuberculosis using a mobile medical unit, Punjab India. *Public Heal action* 2015; 5: 241–5.

**Fig 1:** Sampling Methodology

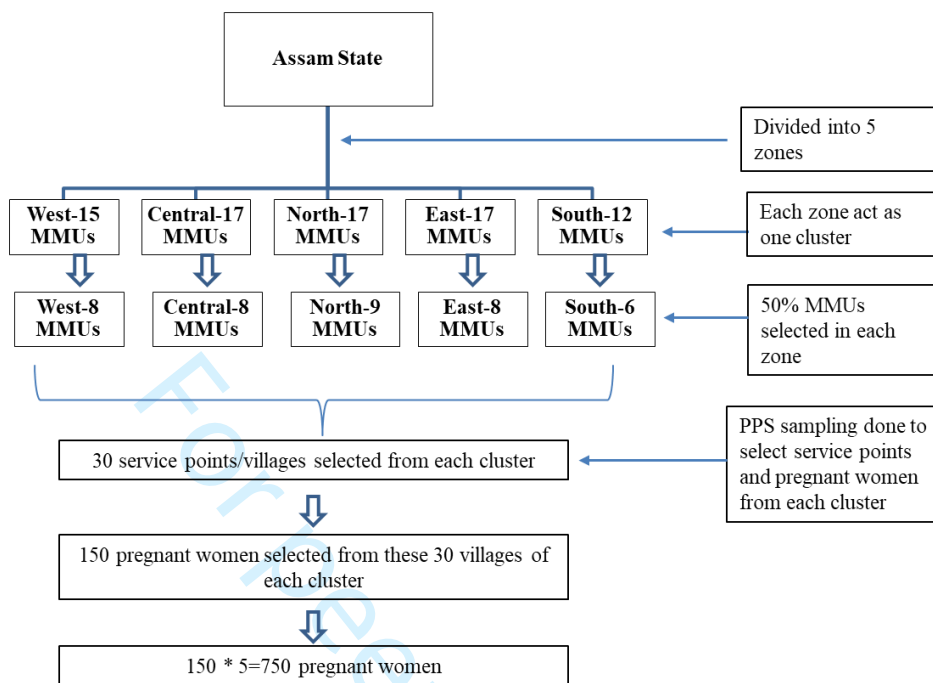

## Annexure 1

## Survey Questionnaire for GDM

| SI No. | GDM Survey Tool                                               |                                                        |
|--------|---------------------------------------------------------------|--------------------------------------------------------|
| 1      | Name of Pregnant woman                                        |                                                        |
| 2      | Name of Husband                                               |                                                        |
| 3      | Age (in Yrs)                                                  | [       ]                                              |
| 4      | District                                                      | [       ]                                              |
| 5      | Block                                                         | [       ]                                              |
| 6      | Village                                                       | [       ]                                              |
| 7      | Religion                                                      | [1] Hindu<br>[2] Muslim<br>[3] Christian<br>[4] Others |
| 8      | Education (Highest qualification)                             | [       ]                                              |
| 9      | Do you consume alcohol?                                       | [Yes/No]                                               |
| 10     | Do you chew or smoke tobacco?                                 | [Yes/No]                                               |
| 11     | Number of ANC's done                                          | [Number]                                               |
| 12     | Whom do you contact during your illness?                      | [HF/doctor/Quack]                                      |
| 13     | Are you consulting any doctor for your regular checkup?       | [Yes/No]                                               |
| 14     | if yes, is the doctor a specialist (O & G)?                   |                                                        |
| 15     | where do you want to have delivery?                           | [Home/Hospital]                                        |
| 16     | Gestation (completed weeks of pregnancy)                      | [       ]                                              |
| 17     | Last Menstrual Period (LMP)                                   | [DD-MM-YY]                                             |
| 18     | Expected Date of Delivery(EDD)                                | [DD-MM-YY]                                             |
| 19     | MCTS ID                                                       | [ID number]                                            |
| 20     | Gravida                                                       | [No. of times pregnant]                                |
| 21     | Parity No.                                                    | [Primi/multipara]                                      |
| 22     | No. of children                                               | [Number]                                               |
| 23     | Order of pregnancy                                            | [Number]                                               |
| 24     | Have you had a stillborn or previous spontaneous miscarriage? | [Yes/No/Don't Know]                                    |
| 25     | Blood Pressure                                                | [Systolic/Diastolic in mm Hg]                          |
| 26     | Height (in metres)                                            | [       ]                                              |
| 27     | Weight (in Kg)                                                | [       ]                                              |
| 28     | BMI (Kg/m <sup>2</sup> )                                      | [       ]                                              |
| 29     | Waist Circumference (in Inches)                               | [       ]                                              |
| 30     | Are you suffering from diabetes(pre-existing)?                | [Yes/No/Don't Know]                                    |

|    |                                                                                 |                     |
|----|---------------------------------------------------------------------------------|---------------------|
| 31 | <b>Do you have family history of type 2 diabetes (parents/brothers/sisters)</b> | [Yes/No/Don't Know] |
| 32 | <b>Have you had diabetes in previous pregnancy?</b>                             | [Yes/No/Don't Know] |
| 33 | <b>Have you had high blood pressure in previous pregnancy?</b>                  | [Yes/No/Don't Know] |
| 34 | <b>Blood sugar level (before OGTT) in mg/dl</b>                                 | [            ]      |
| 35 | <b>Taken 75 gm of glucose</b>                                                   | [Yes/No]            |
| 36 | <b>Blood sugar at 2 hr after taking 75 grams glucose (in mg/dl)</b>             | [            ]      |
| 37 | <b>Suspected Gestational diabetes mellitus</b>                                  | [Yes/No]            |

For peer review only



**STROBE 2007 (v4) checklist of items to be included in reports of observational studies in epidemiology\***  
**Checklist for cohort, case-control, and cross-sectional studies (combined)**

| Section/Topic             | Item # | Recommendation                                                                                                                                                                                                                                                                                                                                                                                                                                                         | Reported on page # |
|---------------------------|--------|------------------------------------------------------------------------------------------------------------------------------------------------------------------------------------------------------------------------------------------------------------------------------------------------------------------------------------------------------------------------------------------------------------------------------------------------------------------------|--------------------|
| Title and abstract        | 1      | (a) Indicate the study's design with a commonly used term in the title or the abstract                                                                                                                                                                                                                                                                                                                                                                                 | 2                  |
|                           |        | (b) Provide in the abstract an informative and balanced summary of what was done and what was found                                                                                                                                                                                                                                                                                                                                                                    | 2                  |
| <b>Introduction</b>       |        |                                                                                                                                                                                                                                                                                                                                                                                                                                                                        |                    |
| Background/rationale      | 2      | Explain the scientific background and rationale for the investigation being reported                                                                                                                                                                                                                                                                                                                                                                                   | 4-5                |
| Objectives                | 3      | State specific objectives, including any pre-specified hypotheses                                                                                                                                                                                                                                                                                                                                                                                                      | 5                  |
| <b>Methods</b>            |        |                                                                                                                                                                                                                                                                                                                                                                                                                                                                        |                    |
| Study design              | 4      | Present key elements of study design early in the paper                                                                                                                                                                                                                                                                                                                                                                                                                | 5                  |
| Setting                   | 5      | Describe the setting, locations, and relevant dates, including periods of recruitment, exposure, follow-up, and data collection                                                                                                                                                                                                                                                                                                                                        | 5-6                |
| Participants              | 6      | (a) <i>Cohort study</i> —Give the eligibility criteria, and the sources and methods of selection of participants. Describe methods of follow-up<br><i>Case-control study</i> —Give the eligibility criteria, and the sources and methods of case ascertainment and control selection. Give the rationale for the choice of cases and controls<br><i>Cross-sectional study</i> —Give the eligibility criteria, and the sources and methods of selection of participants | 7                  |
|                           |        | (b) <i>Cohort study</i> —For matched studies, give matching criteria and number of exposed and unexposed<br><i>Case-control study</i> —For matched studies, give matching criteria and the number of controls per case                                                                                                                                                                                                                                                 |                    |
| Variables                 | 7      | Clearly define all outcomes, exposures, predictors, potential confounders, and effect modifiers. Give diagnostic criteria, if applicable                                                                                                                                                                                                                                                                                                                               | 6-7                |
| Data sources/ measurement | 8*     | For each variable of interest, give sources of data and details of methods of assessment (measurement). Describe comparability of assessment methods if there is more than one group                                                                                                                                                                                                                                                                                   | 7                  |
| Bias                      | 9      | Describe any efforts to address potential sources of bias                                                                                                                                                                                                                                                                                                                                                                                                              | 8                  |
| Study size                | 10     | Explain how the study size was arrived at                                                                                                                                                                                                                                                                                                                                                                                                                              | 7                  |
| Quantitative variables    | 11     | Explain how quantitative variables were handled in the analyses. If applicable, describe which groupings were chosen and why                                                                                                                                                                                                                                                                                                                                           | 8                  |
| Statistical methods       | 12     | (a) Describe all statistical methods, including those used to control for confounding                                                                                                                                                                                                                                                                                                                                                                                  | 8                  |
|                           |        | (b) Describe any methods used to examine subgroups and interactions                                                                                                                                                                                                                                                                                                                                                                                                    | NA                 |
|                           |        | (c) Explain how missing data were addressed                                                                                                                                                                                                                                                                                                                                                                                                                            | NA                 |
|                           |        | (d) <i>Cohort study</i> —If applicable, explain how loss to follow-up was addressed<br><i>Case-control study</i> —If applicable, explain how matching of cases and controls was addressed                                                                                                                                                                                                                                                                              | 8                  |

|                          |     |                                                                                                                                                                                                              |       |
|--------------------------|-----|--------------------------------------------------------------------------------------------------------------------------------------------------------------------------------------------------------------|-------|
|                          |     | <i>Cross-sectional study</i> —If applicable, describe analytical methods taking account of sampling strategy                                                                                                 |       |
|                          |     | (e) Describe any sensitivity analyses                                                                                                                                                                        | NA    |
| <b>Results</b>           |     |                                                                                                                                                                                                              |       |
| Participants             | 13* | (a) Report numbers of individuals at each stage of study—eg numbers potentially eligible, examined for eligibility, confirmed eligible, included in the study, completing follow-up, and analysed            | 8     |
|                          |     | (b) Give reasons for non-participation at each stage                                                                                                                                                         | 8     |
|                          |     | (c) Consider use of a flow diagram                                                                                                                                                                           |       |
| Descriptive data         | 14* | (a) Give characteristics of study participants (eg demographic, clinical, social) and information on exposures and potential confounders                                                                     | 8-9   |
|                          |     | (b) Indicate number of participants with missing data for each variable of interest                                                                                                                          | NA    |
|                          |     | (c) <i>Cohort study</i> —Summarise follow-up time (eg, average and total amount)                                                                                                                             | NA    |
| Outcome data             | 15* | <i>Cohort study</i> —Report numbers of outcome events or summary measures over time                                                                                                                          | NA    |
|                          |     | <i>Case-control study</i> —Report numbers in each exposure category, or summary measures of exposure                                                                                                         | NA    |
|                          |     | <i>Cross-sectional study</i> —Report numbers of outcome events or summary measures                                                                                                                           | 9     |
| Main results             | 16  | (a) Give unadjusted estimates and, if applicable, confounder-adjusted estimates and their precision (eg, 95% confidence interval). Make clear which confounders were adjusted for and why they were included | 10-11 |
|                          |     | (b) Report category boundaries when continuous variables were categorized                                                                                                                                    | NA    |
|                          |     | (c) If relevant, consider translating estimates of relative risk into absolute risk for a meaningful time period                                                                                             | NA    |
| Other analyses           | 17  | Report other analyses done—eg analyses of subgroups and interactions, and sensitivity analyses                                                                                                               | NA    |
| <b>Discussion</b>        |     |                                                                                                                                                                                                              |       |
| Key results              | 18  | Summarise key results with reference to study objectives                                                                                                                                                     | 11-12 |
| Limitations              | 19  | Discuss limitations of the study, taking into account sources of potential bias or imprecision. Discuss both direction and magnitude of any potential bias                                                   | 13    |
| Interpretation           | 20  | Give a cautious overall interpretation of results considering objectives, limitations, multiplicity of analyses, results from similar studies, and other relevant evidence                                   | 13    |
| Generalisability         | 21  | Discuss the generalisability (external validity) of the study results                                                                                                                                        | 13-14 |
| <b>Other information</b> |     |                                                                                                                                                                                                              |       |
| Funding                  | 22  | Give the source of funding and the role of the funders for the present study and, if applicable, for the original study on which the present article is based                                                | 14    |

\*Give information separately for cases and controls in case-control studies and, if applicable, for exposed and unexposed groups in cohort and cross-sectional studies.

**Note:** An Explanation and Elaboration article discusses each checklist item and gives methodological background and published examples of transparent reporting. The STROBE checklist is best used in conjunction with this article (freely available on the Web sites of PLoS Medicine at <http://www.plosmedicine.org/>, Annals of Internal Medicine at <http://www.annals.org/>, and Epidemiology at <http://www.epidem.com/>). Information on the STROBE Initiative is available at [www.strobe-statement.org](http://www.strobe-statement.org).

# BMJ Open

## Prevalence and predictors of Gestational Diabetes Mellitus in rural Assam: A cross-sectional study using mobile medical units

|                                 |                                                                                                                                                                                                                                                                                                                                                                                                                                                                         |
|---------------------------------|-------------------------------------------------------------------------------------------------------------------------------------------------------------------------------------------------------------------------------------------------------------------------------------------------------------------------------------------------------------------------------------------------------------------------------------------------------------------------|
| Journal:                        | <i>BMJ Open</i>                                                                                                                                                                                                                                                                                                                                                                                                                                                         |
| Manuscript ID                   | bmjopen-2020-037836.R1                                                                                                                                                                                                                                                                                                                                                                                                                                                  |
| Article Type:                   | Original research                                                                                                                                                                                                                                                                                                                                                                                                                                                       |
| Date Submitted by the Author:   | 09-Aug-2020                                                                                                                                                                                                                                                                                                                                                                                                                                                             |
| Complete List of Authors:       | Chanda, Subrata; Piramal Healthcare Limited, Clinical Domain<br>Dogra, Vishal; Piramal Healthcare Limited, Research and Analysis<br>Hazarika, Najeeb; Piramal Healthcare Limited, Assam and North East<br>State Office<br>Bambrah, Hardeep; Piramal Healthcare Limited, Operations<br>Sudke, Ajit; Piramal Healthcare Limited, Clinical Domain<br>Vig, Anupa; Piramal Healthcare Limited, Clinical Domain<br>Hegde, Shailendra; Piramal Healthcare Limited, Innovations |
| <b>Primary Subject Heading</b>: | Epidemiology                                                                                                                                                                                                                                                                                                                                                                                                                                                            |
| Secondary Subject Heading:      | Diabetes and endocrinology, Public health                                                                                                                                                                                                                                                                                                                                                                                                                               |
| Keywords:                       | EPIDEMIOLOGY, PRIMARY CARE, Diabetes in pregnancy < DIABETES & ENDOCRINOLOGY                                                                                                                                                                                                                                                                                                                                                                                            |
|                                 |                                                                                                                                                                                                                                                                                                                                                                                                                                                                         |

SCHOLARONE™  
Manuscripts



I, the Submitting Author has the right to grant and does grant on behalf of all authors of the Work (as defined in the below author licence), an exclusive licence and/or a non-exclusive licence for contributions from authors who are: i) UK Crown employees; ii) where BMJ has agreed a CC-BY licence shall apply, and/or iii) in accordance with the terms applicable for US Federal Government officers or employees acting as part of their official duties; on a worldwide, perpetual, irrevocable, royalty-free basis to BMJ Publishing Group Ltd ("BMJ") its licensees and where the relevant Journal is co-owned by BMJ to the co-owners of the Journal, to publish the Work in this journal and any other BMJ products and to exploit all rights, as set out in our [licence](#).

The Submitting Author accepts and understands that any supply made under these terms is made by BMJ to the Submitting Author unless you are acting as an employee on behalf of your employer or a postgraduate student of an affiliated institution which is paying any applicable article publishing charge ("APC") for Open Access articles. Where the Submitting Author wishes to make the Work available on an Open Access basis (and intends to pay the relevant APC), the terms of reuse of such Open Access shall be governed by a Creative Commons licence – details of these licences and which [Creative Commons](#) licence will apply to this Work are set out in our licence referred to above.

Other than as permitted in any relevant BMJ Author's Self Archiving Policies, I confirm this Work has not been accepted for publication elsewhere, is not being considered for publication elsewhere and does not duplicate material already published. I confirm all authors consent to publication of this Work and authorise the granting of this licence.

1  
2  
3 **Prevalence and predictors of Gestational Diabetes Mellitus in rural Assam: A cross-**  
4 **sectional study using mobile medical units**  
5  
6  
7  
8

9 **Subrata Chanda<sup>1</sup>, Vishal Dogra<sup>2</sup>, Najeeb Hazarika<sup>1</sup>, Hardeep Bambrah<sup>1</sup>, Ajit Kisanrao**  
10 **Sudke<sup>3</sup>, Anupa Vig<sup>3</sup>, Shailendra Kumar Hegde<sup>4</sup>**  
11  
12  
13  
14  
15

16 **Corresponding Author:** Vishal Dogra, Research and Analytics, Piramal Swasthya  
17 Management and Research Institute, Plot no. 120, 5<sup>th</sup> Floor, Srinagar Colony, Hyderabad,  
18 India; Email: [vani1825@gmail.com](mailto:vani1825@gmail.com); Tel: +9140-49451999  
19  
20  
21

22  
23 <sup>1</sup>Assam and North East State Office, Piramal Swasthya Management and Research Institute,  
24 Guwahati, India

25  
26 <sup>2</sup>Research and Analytics, Piramal Swasthya Management and Research Institute, Hyderabad,  
27 India

28  
29 <sup>3</sup>Clinical Domain, Piramal Swasthya Management, and Research Institute, Hyderabad,  
30 Telangana, India

31  
32 <sup>4</sup>Department of Innovations, Piramal Swasthya Management and Research Institute,  
33 Hyderabad, India  
34  
35  
36  
37

38 **Word count** (Excluding title page, abstract, references, figures and tables)- **3140**  
39

40 **Key Words:** Gestational Diabetes Mellitus, Assam, Mobile Medical Unit, OGTT  
41  
42  
43  
44  
45  
46  
47  
48  
49  
50  
51  
52  
53  
54  
55  
56  
57  
58  
59  
60

## ABSTRACT

**Objective** To determine the prevalence and predictors of gestational diabetes mellitus (GDM) in rural Assam, India using a network of Mobile Medical Units

**Study Design** A field-based cross-sectional study

**Settings** Rural areas of Assam state, India

**Participants** A total of 1410 pregnant women in gestational age of 24-28 weeks

**Intervention** Identification of pregnant women in 24-28 weeks of pregnancy from villages and administering them Government of India recommended oral glucose tolerance test for Gestational Diabetes Mellitus confirmation.

**Primary and secondary outcome measures** Presence of gestational diabetes among pregnant women, risk factors, and predictors of Gestational Diabetes Mellitus.

**Results** A total of 1212 pregnant women underwent the oral glucose tolerance test. One hundred and ninety-eight women were ineligible due to existing chronic diseases or very high blood glucose level before the test. The overall GDM prevalence in Assam was 16.67% (95% CI 14.61-18.89%). Women aged 26-30 years (aOR 1.70; CI 1.14-2.52), who passed 10th class (aOR 1.58; CI 1.05-2.37), belonging to Muslim religion (aOR 1.52; 95% CI 1.05-2.21), and above poverty line (aOR 1.38; 95% CI 1.00-1.91) had significantly increased likelihood of developing GDM compared to respective baseline groups ( $p < 0.05$ ). Body mass index, gravida, and being non-anaemic were non-significant risk factors for GDM. Family history of diabetes (aOR 1.82; 95% CI 1.08-3.06), and smoking (aOR 1.61; 95% CI 1.10-2.35) were significant and independent predictors of GDM.

**Conclusion** The prevalence of gestational diabetes mellitus in rural Assam is high. The mobile medical units may play a significant role in the implementation of GDM screening, diagnosis, treatment to ensure better maternal and foetal health outcomes in rural Assam.

### Strengths and limitations of this study

1. The study used a representative sample of all eligible pregnant women in rural Assam
2. All eligible pregnant women underwent blood glucose estimation before initiating the oral glucose tolerance test
3. A standardised gold standard oral glucose tolerance test confirmed the presence of gestational diabetes mellitus among pregnant women
4. We could neither obtain a venous blood sample of pregnant women for glucose estimation nor test the blood glucose level early in pregnancy due to operational constraints

For peer review only

## BACKGROUND

Glucose intolerance or high blood sugar detected for the first time during pregnancy is known as Gestational Diabetes Mellitus (GDM).<sup>1</sup> Worldwide GDM is a significant public health problem.<sup>2</sup> GDM not only leads to adverse foetal health outcomes in the form of neonatal jaundice, stillbirths, macrosomia but also affects maternal health.<sup>3</sup> The GDM leads to maternal complications such as preeclampsia, the need for caesarean section, and respiratory distress.<sup>4</sup> Even GDM mother's risk of developing diabetes is up by 10% immediately after delivery. Evidence suggests that children born to GDM mothers are nearly four to eight times more likely to develop diabetes in later life compared to their siblings born to the same parent with no GDM.<sup>5</sup>

GDM affects about four million women in India. The prevalence of GDM in the Indian population is high compared to other Asian countries. At any point in time, The GDM prevalence ranges from 6 to 9% in rural and 12 to 21% in the urban areas.<sup>6 7 8</sup>

The Government of India guidelines mandates age-appropriate GDM screening of pregnant women at primary health centres during regular antenatal check-ups (ANC).<sup>9</sup> However, due to infrequent glucose and insulin supply, and the non-availability of healthcare staff at primary public health facilities in most of the Indian states, GDM screening is not a regular part of ANC visits, results of which rural pregnant women are not timely screened and in some cases, leads to misdiagnosis of GDM among suspected pregnant women.<sup>10 11</sup>

The public health facilities and their problems are no different in the north-eastern Indian state of Assam. Issues like hilly and challenging terrain, poor health infrastructure, and acute shortage of medical doctors at peripheral public health facilities contribute to inadequate or non-implementation of different government health schemes including GDM screening.<sup>12 13</sup> Therefore, reliable GDM data and estimations for rural Assam are inadequately studied. A few research studies, with a limited sample, documented GDM prevalence in scattered rural geography of Assam but all such estimates are from hospital-based studies and lack generalizability.

The state government of Assam runs a large Mobile Medical Unit (MMU) program to deliver basic primary health services to its rural population. The vast network of MMUs allows us not only to study the pattern of healthcare morbidities among program beneficiaries but provide a platform to routinely report and derive the population-based estimates on key health conditions.<sup>14 15</sup> Evidence also suggests that MMUs are useful in screening of diseases



1  
2  
3 like tuberculosis, breast cancer, HIV, hepatitis.<sup>16 17 18</sup> Hence, we take the opportunity to  
4 leverage the MMU platform to reach and screen eligible pregnant women in rural Assam. We  
5 aim to determine the prevalence and associated risk factors of GDM in rural Assam.  
6  
7

## 8 9 **METHODS**

10  
11 We did a cross-sectional study in rural Assam. We divided the state into five zones. Using  
12 multi-stage sampling, pregnant women in the gestational age of 24-28 weeks were identified.  
13 All eligible pregnant women were reached through MMUs in each zone and screened for  
14 GDM using the oral glucose tolerance test (OGTT) irrespective of fasting status.  
15  
16  
17

### 18 19 **Study Design**

20  
21 Cross-sectional study.  
22

### 23 24 **Setting and Participants**

25  
26 The north-eastern state of Assam has a population of 30.12 million with 993 females per  
27 1000 males.<sup>19</sup> As per recent rural health statistics, Assam has a shortfall of 21 % of Sub-  
28 Centres (SCs), 1 % of Primary Health Centres (PHCs) and 28 % of Community Health  
29 Centres(CHCs) against the sanctioned numbers. Access to 15% of sub-centres and 3.1% of  
30 PHCs is difficult due to the unavailability of roads. Nearly 16.8% SCs are beyond 3  
31 kilometres radius of villages and 31.7% of PHCs are beyond 10 km radius of villages.<sup>20</sup>  
32 People in rural Assam depends heavily on public health services (82.7%). As of 2015-17,  
33 Assam has the highest Maternal Mortality Ratio (MMR) in the country at 229 deaths per 100  
34 000 live birth compared to India's MMR of 122. The state reports high Infant Mortality Rate  
35 (44/1000 live births) compared to national averages (33/1000 live births). The incidence of  
36 non-communicable diseases is rising, especially diabetes and hypertension. As per National  
37 Family Health Survey-4, 5.2% women and 6.6% men have high blood sugar levels; 11.8 %  
38 women and 15.1% men have raised blood pressure.<sup>21 22</sup>  
39  
40  
41  
42  
43  
44  
45  
46  
47  
48

### 49 50 **The MMU Program Description**

51  
52 The MMU program, known as "Sanjeevani," in Assam state, is a public-private partnership  
53 between the Government of Assam and Piramal Swasthya Management and Research  
54 Institute (PSMRI). The program scope is to provide promotive, preventive, curative and  
55 referral services to villagers at their doorstep for non-emergency primary health conditions  
56  
57  
58  
59  
60

such as seasonal illnesses and common diseases. The state government provides funds while PSMRI implements field services and run program operations.

Sanjeevani is a nurse-led MMU program, having a fleet of 78 MMUs, and covers nearly 3744 (14.4%) of all villages (26,000) across Assam state. Each MMU has a nurse, pharmacist, laboratory technician and a registration and measurement officer (RMO). Every MMU follows a fixed day service delivery schedule and visit a particular village once in a month for delivering health services.

The program, for its operations, operates in five distinct zones of the state. Table 1 summarises the details of each zone and the numbers of MMUs. For study purpose, we refer to each zone as a cluster.

**Table 1: Zone and District wise distributions of MMUs in rural Assam**

| Zones   | Name of the districts                                          | Districts (#) | MMUs (#) |
|---------|----------------------------------------------------------------|---------------|----------|
| North   | Sonitpur, Dhemaji, Lakhimpur, Darrang, Nagaon                  | 5             | 15       |
| South   | Cachar, Karimganj, Hailakandi, NC Hills                        | 4             | 17       |
| East    | Tinsukia, Dibrugarh, Jorhat, Karbi angling, Golaghat, Sivsagar | 6             | 17       |
| West    | Bongaigaon, Kokrajhar, Dhubri, Barpeta, Chirang, Goalpara      | 6             | 17       |
| Central | Kamrup, Udalguri, Baksa, Nalbari, Morigaon                     | 5             | 12       |

### Study Duration

Data were collected between July 2019 and September 2019.

### Outcome Variable

The presence or absence of GDM among pregnant women confirmed through OGTT is the primary study outcome.

### Independent variables

Sociodemographic variables (age, religion, education, economic status), body mass index (BMI), blood pressure (systolic and diastolic), gravida status (primi and multigravida), haemoglobin levels (for anaemia status), family history of diabetes, miscarriage history, alcohol, and tobacco use. The measurements of height, weight, and blood pressure were taken through the standardised and calibrated equipment as per the WHO STEPS manual.<sup>23</sup>

## Sample Size

We calculated a minimum sample of 150 for each cluster considering the expected proportion of GDM 7%, absolute precision 5%, design defect 1.5, and a 95% confidence interval.

We randomly selected 50% of the MMUs from each cluster. An MMU, on average, covers 48 villages (service delivery points) every month. From each cluster, we randomly selected 30 villages, using a probability proportional to size method. Next, we line listed all pregnant women in the gestational age of 24-28 weeks in the selected villages. However, to extend the benefit of GDM screening, all eligible women in 24-28 weeks of pregnancy were included in the study in the sampled villages. The random selection of MMUs, and villages was done through a random numbers table. Figure 1 depicts the sampling methodology

## Inclusion and Exclusion Criteria

All pregnant women in the gestational age of 24 – 28 weeks were included. Pregnant women with known history of diabetes mellitus or GDM and other chronic illnesses such as cancer, hypertension, asthma, epilepsy, arthritis were excluded from the study. Pregnant women with blood random glucose level >200 mg/dl before initiating OGTT were also excluded.

## GDM Screening-The Oral Glucose Tolerance Test

The study followed Ministry of Health and Family Welfare (MoHFW), Government of India's "Technical and Operational Guidelines for Diagnosis and Management of GDM", which are more relevant for Indian population. These guidelines took into consideration the recommendations of the country's subject experts available national and international evidences including the Diabetes in Pregnancy Study Group in India (DIPSI) and World Health Organization's (1999) GDM diagnostic criteria.<sup>9 24 25</sup>

As per MoHFW guidelines, irrespective of the fasting status, all eligible women were asked to drink 75 grams of anhydrous glucose dissolved in 300 ml of water over five to ten minutes period. After two hours of glucose ingestion, we measured blood glucose levels using plasma calibrated glucometers. A blood sugar level equal to 140 mg/dL or higher indicates GDM.<sup>9</sup>

All diagnosed positive cases were referred to the Primary Health Centre (PHC) Medical Officer (MO) to start the treatment immediately.

## Data Collection

The first step involved line listing of all 24-28 weeks gestation pregnant women in the selected villages. We used government provided “Mother and Child Protection Card” issued to every pregnant mother to ascertain the last date of menstrual period and eligibility. In the next step, we identified a PHC nearest to at least two selected villages. Eligible pregnant women from these villages were then mobilised by a village health worker (Accredited Social Health Activist-ASHA) to a pre-identified PHC. At PHC, two MMUs were on standby. Paramedical staff from one MMU helped PHC doctor in administering the OGTT and recording the results along with capturing other information using a data tool (**Annexure 1**). The other MMU was used to transport all identified pregnant women to and from their homes.

We incentivised ASHAs @\$0.70 (INR 50) per pregnant woman for mobilising a pregnant woman to respective health facilities. The presence of a MO helped in managing any emergency and initiating immediate treatment for GDM positive cases.

Data were collected from July-Sept 2019 using a survey tool.

## Data Analysis

Primary data were entered into excel and imported into STATA (version 15.1) for further analysis.<sup>26</sup> Categorical data were presented as percentages (%) and Pearson’s Chi-square test was used to evaluate the difference in proportions. Logistic regression method established the independent associations between the outcome and the predictor variables giving odds ratios, 95% confidence intervals and p-values.

## Patient and public involvement

No patient or public members were involved in the design and execution of this study.

## Ethical Considerations

Piramal Swasthya Management and Research Institute’s institutional research ethics committee approved the study (letter no. PSMRI/2019/11 dated 11<sup>th</sup> May 2019). In addition, we took administrative approval from the Government of Assam for smooth field operations. Research participants were told the purpose of the study and provided written informed consent.

## RESULTS

A total of 1410 women were eligible for the study of which 198 pregnant were suffering from chronic illnesses including diabetes or blood glucose level >200 mg/dl before initiating OGTT, hence were excluded. We report the analysis of eligible 1212 pregnant women who underwent the OGTT.

The mean age of the study sample was 23.7 years (SD  $\pm$  4.20) years. More than two-thirds (70%) women were in 15-25 years age group. More than half (55%) were Hindu, educated up to primary level (50%), and belonging to below poverty line (74%). Nearly one third (32%) had abnormal BMI, and very few were hypertensive (3%). More than half (51%) were already having three or more children. A large proportion of women were anaemic (83%). A few women reported a family history of diabetes (6%) or abortion (7%) in their previous pregnancy. A few pregnant women were smokers (2%) (Table 2).

**Table 2: Basic characteristics of Pregnant Women according to GDM status in Rural Assam (2019)**

| Variable                            | GDM (-)<br>N= 1010 (%) | GDM (+)<br>N=202 (%) | Total<br>N=1212 (%) |
|-------------------------------------|------------------------|----------------------|---------------------|
| <b>Age (Mean<math>\pm</math>SD)</b> | 23.5 (4.04)            | 24.4 (4.6)           | 23.7 (4.2)          |
| <b>Age Categories</b>               |                        |                      |                     |
| 15-20 Years                         | 291 (29)               | 51 (25)              | 342 (28)            |
| 21-25 Years                         | 437 (43)               | 71 (35)              | 508 (42)            |
| 26-30 Years                         | 235 (23)               | 63 (31)              | 298 (25)            |
| >30 Years                           | 47 (5)                 | 17 (8)               | 64 (5)              |
| <b>Religion</b>                     |                        |                      |                     |
| Hindu                               | 566 (56)               | 102 (51)             | 668 (55)            |
| Muslim                              | 433 (43)               | 99 (49)              | 532 (44)            |
| Christian                           | 11 (1)                 | 1 (1)                | 12 (1)              |
| <b>Education</b>                    |                        |                      |                     |
| Illiterate                          | 71 (7)                 | 10 (5)               | 81 (7)              |
| Primary School                      | 516 (51)               | 93 (46)              | 609 (50)            |
| 10th Pass                           | 234 (23)               | 53 (26)              | 287 (24)            |
| 12th Pass                           | 136 (14)               | 31 (15)              | 167 (14)            |
| Graduate and above                  | 53 (5)                 | 15 (7)               | 68 (6)              |
| <b>Economic Status</b>              |                        |                      |                     |
| Above Poverty Line                  | 247 (24)               | 68 (34)              | 315 (26)            |
| Below Poverty Line                  | 763 (76)               | 134 (66)             | 897 (74)            |
| <b>Body Mass Index</b>              |                        |                      |                     |
| Normal                              | 700 (69)               | 125 (62)             | 825 (68)            |
| Underweight                         | 194 (19)               | 43 (21)              | 237 (20)            |
| Overweight/Obese                    | 116 (12)               | 34 (17)              | 150 (12)            |

| <b>Blood Pressure levels</b> |                                    |          |          |            |
|------------------------------|------------------------------------|----------|----------|------------|
|                              | Normal                             | 681 (67) | 138 (68) | 819 (68)   |
|                              | Prehypertension                    | 300 (30) | 54 (27)  | 354 (29)   |
|                              | Hypertension                       | 29 (3)   | 10 (5)   | 39 (3)     |
| <b>Gravida Status</b>        |                                    |          |          |            |
|                              | Primigravida                       | 499 (49) | 97 (48)  | 596 (49)   |
|                              | Multigravida                       | 511 (51) | 105 (52) | 616 (51)   |
|                              | <b>Anaemia (Y)</b>                 | 846 (84) | 156(77)  | 1,002 (83) |
|                              | <b>Diabetes Family History (Y)</b> | 51 (5)   | 24 (12)  | 75 (6)     |
|                              | <b>Miscarriage History (Y)</b>     | 70 (7)   | 19 (9)   | 89 (7)     |
|                              | <b>Current Smoker (Y)</b>          | 21 (2)   | 8 (4)    | 29 (2)     |

**Table 3: Prevalence of GDM (Zone wise) in rural Assam, (2019)**

| <b>Zone</b>  | <b>N</b>    | <b>GDM Prevalence (%)</b> | <b>95% CI</b> | <b>P-value</b> |
|--------------|-------------|---------------------------|---------------|----------------|
| North        | 218         | 18.4                      | 13.7-24.1     | 0.18           |
| South        | 253         | 15.0                      | 11.1-20.0     |                |
| Central      | 282         | 20.6                      | 16.2-25.7     |                |
| East         | 194         | 12.9                      | 8.8-18.4      |                |
| West         | 265         | 15.5                      | 11.6-20.3     |                |
| <b>Total</b> | <b>1212</b> | <b>16.7</b>               |               |                |

North (Sonitpur, Dhemaji, Lakhimpur, Darrang, Nagaon), South (Cachar, Karimganj, Hailakandi, N C Hills), Central (Kamrup, Udalguri, Baksa, Nalbari, Morigaon), East (Tinsukia, Dibrugarh, Jorhat, Karbi angling, Golaghat), West (Bongaigaon, Kokrajhar, Dhubri, Barpeta, Chirang, Goalpara)

The GDM prevalence in rural Assam is 16.7% (range 12.9-20.6%). The central zone has a higher GDM prevalence (20.6%) compared to the other four zones (North-18.4%; South-15.0%; East-12.9%; West-15.5%). (Table 3).

We found an increased likelihood of GDM with increasing age. Pregnant women (aged 26-30 years) were 1.7 times [adjusted odds ratio (aOR); 95% Confidence Interval (CI)] (aOR 1.7; 95% CI 1.14-2.52) more likely to have GDM compared to younger women (15-20 years) (p=0.01). Women who passed 10<sup>th</sup> class (aOR 1.58; CI 1.05-2.37), belonging to Muslim religion (aOR 1.52; 95% CI 1.05-2.21), and above poverty line (aOR 1.38; 95% CI 1.00-1.91) had significantly increased likelihood of developing GDM compared to respective baseline groups (p<0.05). Gravida status, BMI, and being non-anaemic were non-significant risk factors for GDM. Family history of diabetes (aOR 1.82; 95% CI 1.08-3.06), and smoking (aOR 1.61; 95% CI 1.10-2.35) were significant and independent predictors of GDM (Table 4).

**Table 4: Crude and adjusted Odds Ratios (with Confidence Intervals) of GDM in relation to other predictor variables**

| Variable                   | Unadjusted          |         | Adjusted            |         |         |
|----------------------------|---------------------|---------|---------------------|---------|---------|
|                            | Odds Ratio (95% CI) | P-value | Odds Ratio (95% CI) | P-value | P-value |
| <b>Age</b>                 |                     |         |                     |         |         |
| 15-20 years                | 1.00                |         | 1.00                |         |         |
| 21-25 years                | 0.93 (0.63-1.37)    | 0.70    | 1.00 (0.54-1.84)    |         | 0.99    |
| *26-30 years               | 1.53 (1.02-2.30)    | 0.04    | 1.70 (1.14-2.52)    |         | 0.01    |
| > 30 years                 | 2.06 (1.10-3.87)    | 0.02    | 2.33 (0.78-6.95)    |         | 0.13    |
| <b>Education</b>           |                     |         |                     |         |         |
| Illiterate                 | 1.00                |         | 1.00                |         |         |
| Primary School             | 1.28 (0.64-2.57)    | 0.49    | 1.28 (0.52-3.16)    |         | 0.58    |
| *10th Pass                 | 1.61(0.78-3.32)     | 0.20    | 1.58(1.05-2.37)     |         | 0.03    |
| 12th Pass                  | 1.62(0.75-3.49)     | 0.22    | 1.41 (0.94-2.11)    |         | 0.10    |
| Graduate and above         | 2 (0.84-4.82)       | 0.12    | 1.47 (0.62-3.48)    |         | 0.38    |
| <b>Religion</b>            |                     |         |                     |         |         |
| Hindu                      | 1.00                |         | 1.00                |         |         |
| *Muslim                    | 1.27 (0.94-1.72)    | 0.12    | 1.52 (1.05-2.21)    |         | 0.03    |
| Christian                  | 0.5 (0.06-3.95)     | 0.52    | 0.70 (0.14-3.45)    |         | 0.66    |
| <b>Economic status</b>     |                     |         |                     |         |         |
| Below Poverty Line (BPL)   | 1.00                |         | 1.00                |         |         |
| *Above Poverty Line (APL)  | 1.56 (1.13-2.17)    | 0.01    | 1.38 (1.00-1.91)    |         | 0.05    |
| <b>Body Mass Index</b>     |                     |         |                     |         |         |
| Normal                     | 1.00                |         | 1.00                |         |         |
| Underweight                | 1.24 (0.85-1.82)    | 0.27    | 1.35 (0.93-1.96)    |         | 0.11    |
| Overweight/Obese           | 1.64 (1.07-2.51)    | 0.02    | 1.38 (0.90-2.10)    |         | 0.13    |
| <b>Gravida</b>             |                     |         |                     |         |         |
| Multigravida               | 1.00                |         | 1.00                |         |         |
| Primigravida               | 0.95 (0.70-1.28)    | 0.72    | 1.27 (0.84-1.92)    |         | 0.25    |
| <b>Haemoglobin Status</b>  |                     |         |                     |         |         |
| Anaemic                    | 1.00                |         | 1.00                |         |         |
| Non-Anaemic                | 1.52 (1.05-2.20)    | 0.03    | 1.46 (0.94-2.26)    |         | 0.09    |
| <b>Diabetes in Family</b>  |                     |         |                     |         |         |
| No                         | 1.00                |         | 1.00                |         |         |
| *Yes                       | 2.53 (1.52-4.22)    | 0.00    | 1.82 (1.08-3.06)    |         | 0.02    |
| <b>Miscarriage History</b> |                     |         |                     |         |         |
| No                         | 1.00                |         | 1.00                |         |         |
| Yes                        | 1.4 (0.82-2.37)     | 0.22    | 1.53 (0.93-2.52)    |         | 0.09    |

### Smoking Status

|                  |                  |      |                  |      |
|------------------|------------------|------|------------------|------|
| Non-smokers      | 1.00             |      | 1.00             |      |
| *Current Smokers | 1.94 (0.85-4.45) | 0.13 | 1.61 (1.10-2.35) | 0.01 |

Estimates were calculated using logistic regression with a robust cluster estimator of the variance in stata 15.1. The clustered standard error estimated with clustering at the zone level. \*Significant variable in multivariate logistic regression

## DISCUSSION

Using a network of mobile medical units in rural Assam, we derived not only the first-hand estimates of GDM prevalence and its relationship with sociodemographic and other risk but also assessed the feasibility of GDM screening in the community settings. In our study, the basic characteristics of GDM mothers and non-GDM mothers did not vary significantly (not shown in results) except for age, BMI, economic status and family history of diabetes.

The study sample consists of pregnant young, literate, Hindu and Muslim females which correspond to the latest population statistics of the state.<sup>27</sup> We found GDM prevalence of 16.7% in rural Assam (range- 12.9 to 20.6%). Education (10th pass), age (26 to 30 years), religion (Muslim), socio-economic status (above the poverty line), tobacco use (currently smokers) and past history (family history of diabetes) were the significant primary predictors of GDM in rural Assam. The GDM prevalence estimates, as found in our study, in rural Assam, are high compared to international and national evidence. For example, studies from Bangladesh, Egypt, and Ethiopia reported prevalence rates of 9.7%, 8.0%, and 7.7% respectively.<sup>28 29 30</sup> Likewise, GDM prevalence ranges from 6 to 9% in rural India and remains high for rural Assam.<sup>7 8 31 32 33 34</sup> It is imperative to state that majorities of the Indian evidence come from studies done in North and South India. Studies from northeast India are scarce and primarily done under hospital settings. Evidence from these studies reports a low prevalence of GDM in the northeast region (Assam 3%, Manipur 0–1%,) compared to other states (Jammu and Kashmir 3.8–11%; Maharashtra 0.5–9.5%; Andhra Pradesh 17.20–21.81%; and Uttar Pradesh 13.38–41.87%). Similarly, studies from rural and urban India found a considerable variation in GDM prevalence in rural (0.5-13.9%) and urban areas (0.56-41.9%) respectively.<sup>8 35 36</sup>

Geographically, the central zone districts had the highest GDM prevalence among all study zones. The geographical differences in prevalence in different regions are due to differences in the demographic and socio-economic status of pregnant women in these regions.<sup>32</sup> Studies show that the likelihood of GDM among pregnant women increases with increasing maternal



1  
2  
3 age, and BMI. Particularly mothers aged 25 years or more have increased risk of GDM and  
4 the likelihood of GDM rises after 25 years of age. In our study, we found a similar trend  
5 finding a non-significant positive relationship between the two. Evidence around the world  
6 suggests maternal age and BMI as significant predictors for GDM.<sup>37 38</sup> However, in our study,  
7 pregnant women aged 26-30 years only had a significantly increased likelihood of GDM,  
8 while BMI had no significant association. The increased risk of GDM in Muslim women  
9 (compared to Hindu women) could be due to differential social and behavioural culture, and  
10 or belief and health practices that were not investigated in this study. Family history of  
11 diabetes and current smoking status were significant predictors of GDM and findings were  
12 similar as reported in other studies.<sup>30 39 40</sup> However, unlike other studies, our study did not  
13 find any significant association between GDM and hypertension.<sup>38 39</sup>

22  
23 Among GDM confirmed cases, a high fraction (34%) were from APL category compared to  
24 non-GDM APL women (24%). This result is inconsistent with other studies where low socio-  
25 economic status emerges as a significant risk factor for the development of type 2 diabetes  
26 mellitus.<sup>40 41</sup> This may also be due to the fact our study sample is from rural areas where  
27 monthly disposable income is less than the national or state averages.<sup>27</sup> Socio-economic status  
28 and education had no significant effect on developing GDM which is in line with other  
29 studies finding no independent association between GDM, education and socio-economic  
30 status.<sup>16 41</sup> A higher proportion of pregnant women in our study were anaemic (83%). The  
31 rates of anaemia were disproportionately higher compared to state averages (45.7%) and as  
32 reported in a local study (72%) conducted in a rural block of Dibrugarh district of Assam  
33 state.<sup>41 42</sup> This could be explained to poor dietary habits and local food culture among  
34 pregnant women.<sup>43</sup> Further, we found an inverse relationship between anaemia and GDM  
35 adjusted for other variables and this finding aligns to as reported in other studies examining  
36 the association of GDM and anaemia.<sup>40</sup>

47  
48 Our study is an attempt to define GDM prevalence estimates in rural Assam. This was  
49 possible because of three factors (1) unique presence and positioning of an extensive network  
50 of MMUs in rural Assam reaching to far-flung remote areas (2) government ownership and  
51 support for carrying field data collection. Auxiliary Nurse Midwives and ASHAs helped  
52 identification and mobilisation of pregnant women from the villages to respective MMU  
53 screening points located at public health facilities (3) presence of government MOs during  
54 screening helped in prompt treatment of GDM positive women and counselling support.  
55  
56  
57  
58  
59  
60 Despite a large study, we faced certain definite challenges. First, due to resource constraints,

1  
2  
3 we could not obtain a venous blood sample of pregnant women for glucose estimation.  
4  
5 Secondly, maternal blood glucose estimation during the initial phase of pregnancy could not  
6  
7 be assessed. This could have reinforced our findings. However, we tested maternal blood  
8  
9 glucose before initiating OGTT. Additionally, we could not ascertain the reasons for the  
10  
11 association of above poverty line pregnant women with GDM due to unavailability of data.  
12  
13 Further research is needed on this. However, despite its limitations, our study used a  
14  
15 representative sample of all eligible pregnant women in rural Assam. A standardised gold  
16  
17 standard oral glucose tolerance test confirmed the presence of GDM among pregnant women.  
18  
19 In summary, MMUs are increasingly becoming an essential component in resource-  
20  
21 constrained health systems. Such a unique model of healthcare service delivery not only  
22  
23 reach the difficult and underserved areas but has the potential to screen communicable and  
24  
25 non-communicable conditions and linking beneficiaries with the local healthcare for timely  
26  
27 and prompt health interventions.<sup>16</sup>

## 28 29 30 31 32 33 34 35 36 37 38 39 40 41 42 43 44 45 46 47 48 49 50 51 52 53 54 55 56 57 58 59 60

### CONCLUSIONS

Our study gives first-hand estimates of GDM prevalence in rural Assam. A high prevalence of GDM in rural Assam warrants immediate government attention to safeguard the maternal and child health in the state. MMUs could be an option to initiate GDM screening in rural areas with appropriate compliance to guidelines and sufficient resource allocation.

### Funding

This work was supported by World Diabetes Foundation [Project-number WDF 15-956].

### Declaration of interests

We declare no competing interests

### Data availability statement

Data can be requested from the principal investigator citing a reasonable request.

### Contributors

SC, VD and SH conceptualised the study. NH and HB supervised the field operations and data collection. SC cleaned the field data and wrote the first draft paper. VD performed the statistical analysis, interpreted the results and wrote the final manuscript. SH, AS, AV supervised the data transcription, and reviewed and edited the manuscript. All authors approved the final version of the manuscript.

## Acknowledgements

World diabetes foundation for funding the study. Government of Assam for ensuring smooth field operations. All pregnant women who participated in the study and front-line health workers who helped to identify and mobilise pregnant women from their residences.

## ORCID Ids of Authors

Subrata Chanda <https://orcid.org/0000-0003-3427-4731>

Vishal Dogra <https://orcid.org/0000-0001-9725-5699>

Najeeb Hazarika <https://orcid.org/0000-0001-6778-6325>

Hardeep Bambhrah <https://orcid.org/0000-0002-9209-9743>

Ajit Sudke <https://orcid.org/0000-0001-7068-8478>

Anupa Vig <https://orcid.org/0000-0003-3074-3844>

Shailendra Hegde <https://orcid.org/0000-0002-8756-9085>

peer review only

## References:

- 1 Catalano PM, McIntyre HD, Cruickshank JK, *et al.* The hyperglycemia and adverse pregnancy outcome study: Associations of GDM and obesity with pregnancy outcomes. *Diabetes Care* 2012; **35**: 780–6.
- 2 Bhat M, Ramesha KN, Sarma SP, Menon S, Sowmini C V., Ganesh Kumar S. Determinants of gestational diabetes mellitus: A case control study in a district tertiary care hospital in south India. *Int J Diabetes Dev Ctries* 2010; **30**: 91–6.
- 3 Crowther CA, Hiller JE, Moss JR, McPhee AJ, Jeffries WS, Robinson JS. Effect of treatment of gestational diabetes mellitus on pregnancy outcomes. *N Engl J Med* 2005; **352**: 2477–86.
- 4 Buchanan TA, Xiang AH, Page KA. Gestational diabetes mellitus: Risks and management during and after pregnancy. *Nat Rev Endocrinol* 2012; **8**: 639–49.
- 5 Damm P. Future risk of diabetes in mother and child after gestational diabetes mellitus. *Int J Gynaecol Obstet* 2009; **104 Suppl**: S25-6.
- 6 Anjana RM, Deepa M, Pradeepa R, *et al.* Articles Prevalence of diabetes and prediabetes in 15 states of India: results from the ICMR-INDIAB population-based cross-sectional study. *LANCET Diabetes Endocrinol* 2017. DOI:10.1016/S2213-8587(17)30174-2.
- 7 Seshiah V, Balaji V, Balaji MS, *et al.* Prevalence of gestational diabetes mellitus in South India (Tamil Nadu) - A community based study. *J Assoc Physicians India* 2008; **56**: 329–33.
- 8 Zargar AH, Sheikh MI, Bashir MI, *et al.* Prevalence of gestational diabetes mellitus in Kashmiri women from the Indian subcontinent. *Diabetes Res Clin Pract* 2004; **66**: 139–45.
- 9 Maternal Health Division. Diagnosis & Management of Gestational Diabetes Mellitus Technical Guidelines. New Delhi, 2018  
[https://nhm.gov.in/New\\_Updates\\_2018/NHM\\_Components/RMNCH\\_MH\\_Guidelines/Gestational-Diabetes-Mellitus.pdf](https://nhm.gov.in/New_Updates_2018/NHM_Components/RMNCH_MH_Guidelines/Gestational-Diabetes-Mellitus.pdf).
- 10 Kasthuri A. Challenges to Healthcare in India - The Five A's. *Indian J Community Med* 2018; **43**: 141–3.
- 11 Seshiah V, Balaji V, Balaji MS, Paneerselvam A, Kapur A. Pregnancy and diabetes scenario around the world: India. *Int J Gynecol Obstet* 2009. DOI:10.1016/j.ijgo.2008.11.035.
- 12 Saikia D, Das KK. Access to Public Health-Care in the Rural Northeast India. *NEHU J* 2014; **XII**: 77–100.
- 13 Mahalakshmi MM, Bhavadharini B, Maheswari K, *et al.* Comparison of maternal and fetal outcomes among Asian Indian pregnant women with or without gestational diabetes mellitus: A situational analysis study (WINGS-3). *Indian J Endocrinol Metab* 2016; **20**: 491–6.
- 14 Hill C, Zurakowski D, Bennet J, *et al.* Knowledgeable neighbors: A mobile clinic model for disease prevention and screening in underserved communities. *Am J Public Health* 2012; **102**: 406–10.
- 15 Dogra V, Hegde S, Rathnam N, Emmadi S, Phanse V. Large Scale Mobile Medical Service Programme: Data Insights for strengthening local surveillance. *Online J Public Health Inform* 2019; **11**. DOI:10.5210/ojphi.v11i1.9817.
- 16 Binopal G, Agarwal P, Kaur N, *et al.* Screening difficult-to-reach populations for tuberculosis using a mobile medical unit, Punjab India. *Public Heal action* 2015; **5**: 241–5.
- 17 Morano JP, Zelenev A, Lombard A, Marcus R, Gibson BA, Altice FL. Strategies for

- 1  
2  
3 Hepatitis C Testing and Linkage to Care for Vulnerable Populations: Point-of-Care  
4 and Standard HCV Testing in a Mobile Medical Clinic. *J Community Health* 2014; **39**:  
5 922–34.  
6  
7 18 Greenwald ZR, Fregnani JH, Longatto-Filho A, *et al.* The performance of mobile  
8 screening units in a breast cancer screening program in Brazil. *Cancer Causes Control*  
9 2018; **29**: 233–41.  
10  
11 19 Government of India, Registrar General & Census Commissioner I. Census of India  
12 2011: Population, Size and Decadal Change, Chapter 1. In: Census 2011. 2013: 561–3.  
13 20 Indian Institute of Population Sciences. District Level Household Facility Survey 4.  
14 Mumbai, 2013 <http://rchiips.org/DLHS-4.html>.  
15 21 International Institute for Population Sciences. National Family Health Survey-4  
16 Assam Fact Sheet. Mumbai, 2015  
17 [http://rchiips.org/nfhs/pdf/NFHS4/AS\\_FactSheet.pdf](http://rchiips.org/nfhs/pdf/NFHS4/AS_FactSheet.pdf).  
18 22 Registrar General of India. Sample Registration System. New Delhi, 2019  
19 [http://censusindia.gov.in/vital\\_statistics/SRS\\_Bulletins/SRS\\_Bulletin-Rate-2017-](http://censusindia.gov.in/vital_statistics/SRS_Bulletins/SRS_Bulletin-Rate-2017-)  
20 [\\_May\\_2019.pdf](http://censusindia.gov.in/vital_statistics/SRS_Bulletins/SRS_Bulletin-Rate-2017-May_2019.pdf).  
21 23 World Health Organization. The WHO STEPwise approach to noncommunicable  
22 disease risk factor surveillance (STEPS). Geneva  
23 [https://www.who.int/ncds/surveillance/steps/instrument/STEPS\\_Instrument\\_V3.2.pdf](https://www.who.int/ncds/surveillance/steps/instrument/STEPS_Instrument_V3.2.pdf).  
24 24 Polur H, Prasad K, Bandela P, Hindumathi, Saheb S. Diabetes in Pregnancy Study  
25 Group in India (DIPSI) – A Novel Criterion to Diagnose GDM. *Int J Biochem Res Rev*  
26 2016; **10**: 1–6.  
27 25 World Health Organization. Definition, diagnosis and classification of Diabetes  
28 mellitus and its complications. Part I: Diagnosis and classification of Diabetes mellitus  
29 WHO/MCD/MCS/99.2 ed. Geneva, 1999  
30 [https://apps.who.int/iris/bitstream/handle/10665/66040/WHO\\_NCD\\_NCS\\_99.2.pdf?se](https://apps.who.int/iris/bitstream/handle/10665/66040/WHO_NCD_NCS_99.2.pdf?sequence=1)  
31 [quence=1](https://apps.who.int/iris/bitstream/handle/10665/66040/WHO_NCD_NCS_99.2.pdf?sequence=1).  
32 26 StataCorp. Stata Statistical Software: Release 15 College Station, TX: StataCorp LP.  
33 2017.  
34 27 Ministry of Home Affairs. Census of India Website : Office of the Registrar General  
35 & Census Commissioner, India. Dist. Census Handb. 2011.  
36 <http://censusindia.gov.in/2011census/dchb/Assam.html>.  
37 28 Jesmin S, Akter S, Akashi H, *et al.* Screening for gestational diabetes mellitus and its  
38 prevalence in Bangladesh. *Diabetes Res Clin Pract* 2014; **103**: 57–62.  
39 29 A. Khalil N. Screening for Gestational Diabetes Among Pregnant Women Attending a  
40 Rural Family Health Center- Menoufia Governorate- Egypt. *J Fam Med Heal Care*  
41 2017; **3**: 6.  
42 30 Seyoum B, Kiros K, Haileselese T, Leole A. Prevalence of gestational diabetes  
43 mellitus in rural pregnant mothers in northern Ethiopia. *Diabetes Res Clin Pract* 1999;  
44 **46**: 247–51.  
45 31 Bhatt AA, Dhore PB, Purandare VB, Sayyad MG, Mandal MK, Unnikrishnan AG.  
46 Gestational diabetes mellitus in rural population of Western India - Results of a  
47 community survey. *Indian J Endocrinol Metab* 2015; **19**: 507–10.  
48 32 Mithal A, Bansal B, Kalra S. Gestational diabetes in India: Science and society. *Indian*  
49 *J Endocrinol Metab* 2015; **19**: 701–4.  
50 33 Rajput M, Bairwa M, Rajput R. Prevalence of gestational diabetes mellitus in rural  
51 Haryana: A community-based study. *Indian J Endocrinol Metab* 2014; **18**: 350–4.  
52 34 Kalra P, Kachhwaha C, Singh H. Prevalence of gestational diabetes mellitus and its  
53 outcome in western Rajasthan. *Indian J Endocrinol Metab* 2013; **17**: 677.  
54 35 Verma A, Singh B, Mengi V. Gestational diabetes in rural women of jammu. *Indian J*

- 1  
2  
3  
4  
5  
6  
7  
8  
9  
10  
11  
12  
13  
14  
15  
16  
17  
18  
19  
20  
21  
22  
23  
24  
25  
26  
27  
28  
29  
30  
31  
32  
33  
34  
35  
36  
37  
38  
39  
40  
41  
42  
43  
44  
45  
46  
47  
48  
49  
50  
51  
52  
53  
54  
55  
56  
57  
58  
59  
60
- Community Med* 2008; **33**: 54–5.
- 36 Li KT, Naik S, Alexander M, Mathad JS. Screening and diagnosis of gestational diabetes in India: a systematic review and meta-analysis. *Acta Diabetol* 2018; **55**: 613–25.
- 37 Erem C, Kuzu UB, Deger O, Can G. Prevalence of gestational diabetes mellitus and associated risk factors in Turkish women: The Trabzon GDM Study. *Arch Med Sci* 2015; **11**: 724–35.
- 38 Fathy, Khalil NA, Mahmoud NS. Risk factors for gestational diabetes mellitus among pregnant women attending Monshaat Sultan Family Health Center, Menoufia Governorate. *Menoufia Med J* 2018; **31**: 640.
- 39 Leng J, Shao P, Zhang C, *et al*. Prevalence of gestational diabetes mellitus and its risk factors in Chinese pregnant women: A prospective population-based study in Tianjin, China. *PLoS One* 2015; **10**. DOI:10.1371/journal.pone.0121029.
- 40 Lao TT, Ho LF. Impact of Iron Deficiency Anemia on Prevalence of Gestational Diabetes Mellitus. *Diabetes Care* 2004; **27**: 650–6.
- 41 Shen JJ, Tymkow C, MacMullen N. Disparities in maternal outcomes among four ethnic populations. *Ethn Dis* 2005; **15**: 492–7.
- 42 Mahanta T, Deuri A, Mahanta B, *et al*. Maternal and foetal outcome of gestational diabetes mellitus in a rural block of Assam, India. *Clin Epidemiol Glob Heal* 2014; **2**: 3–18.
- 43 Goswami RG, Thakur MB. Folk beliefs of food avoidance and prescription among menstruating and pregnant Karbi women of Kamrup district, Assam. *J Ethn Foods* 2019; **6**: 19.

**Fig 1:** Sampling Methodology



## Annexure 1

## Survey Questionnaire for GDM

| SI No. | GDM Survey Tool                                               |                                                        |
|--------|---------------------------------------------------------------|--------------------------------------------------------|
| 1      | Name of Pregnant woman                                        |                                                        |
| 2      | Name of Husband                                               |                                                        |
| 3      | Age (in Yrs)                                                  | [       ]                                              |
| 4      | District                                                      | [       ]                                              |
| 5      | Block                                                         | [       ]                                              |
| 6      | Village                                                       | [       ]                                              |
| 7      | Religion                                                      | [1] Hindu<br>[2] Muslim<br>[3] Christian<br>[4] Others |
| 8      | Education (Highest qualification)                             | [       ]                                              |
| 9      | Do you consume alcohol?                                       | [Yes/No]                                               |
| 10     | Do you chew or smoke tobacco?                                 | [Yes/No]                                               |
| 11     | Number of ANC's done                                          | [Number]                                               |
| 12     | Whom do you contact during your illness?                      | [HF/doctor/Quack]                                      |
| 13     | Are you consulting any doctor for your regular checkup?       | [Yes/No]                                               |
| 14     | if yes, is the doctor a specialist (O & G)?                   |                                                        |
| 15     | where do you want to have delivery?                           | [Home/Hospital]                                        |
| 16     | Gestation (completed weeks of pregnancy)                      | [       ]                                              |
| 17     | Last Menstrual Period (LMP)                                   | [DD-MM-YY]                                             |
| 18     | Expected Date of Delivery(EDD)                                | [DD-MM-YY]                                             |
| 19     | MCTS ID                                                       | [ID number]                                            |
| 20     | Gravida                                                       | [No. of times pregnant]                                |
| 21     | Parity No.                                                    | [Primi/multipara]                                      |
| 22     | No. of children                                               | [Number]                                               |
| 23     | Order of pregnancy                                            | [Number]                                               |
| 24     | Have you had a stillborn or previous spontaneous miscarriage? | [Yes/No/Don't Know]                                    |
| 25     | Blood Pressure                                                | [Systolic/Diastolic in mm Hg]                          |
| 26     | Height (in metres)                                            | [       ]                                              |
| 27     | Weight (in Kg)                                                | [       ]                                              |
| 28     | BMI (Kg/m <sup>2</sup> )                                      | [       ]                                              |
| 29     | Waist Circumference (in Inches)                               | [       ]                                              |
| 30     | Are you suffering from diabetes(pre-existing)?                | [Yes/No/Don't Know]                                    |



|    |                                                                                 |                     |
|----|---------------------------------------------------------------------------------|---------------------|
| 31 | <b>Do you have family history of type 2 diabetes (parents/brothers/sisters)</b> | [Yes/No/Don't Know] |
| 32 | <b>Have you had diabetes in previous pregnancy?</b>                             | [Yes/No/Don't Know] |
| 33 | <b>Have you had high blood pressure in previous pregnancy?</b>                  | [Yes/No/Don't Know] |
| 34 | <b>Blood sugar level (before OGTT) in mg/dl</b>                                 | [            ]      |
| 35 | <b>Taken 75 gm of glucose</b>                                                   | [Yes/No]            |
| 36 | <b>Blood sugar at 2 hr after taking 75 grams glucose (in mg/dl)</b>             | [            ]      |
| 37 | <b>Suspected Gestational diabetes mellitus</b>                                  | [Yes/No]            |

For peer review only

**STROBE 2007 (v4) checklist of items to be included in reports of observational studies in epidemiology\***  
**Checklist for cohort, case-control, and cross-sectional studies (combined)**

| Section/Topic             | Item # | Recommendation                                                                                                                                                                                                                                                                                                                                                                                                                                                         | Reported on page # |
|---------------------------|--------|------------------------------------------------------------------------------------------------------------------------------------------------------------------------------------------------------------------------------------------------------------------------------------------------------------------------------------------------------------------------------------------------------------------------------------------------------------------------|--------------------|
| Title and abstract        | 1      | (a) Indicate the study's design with a commonly used term in the title or the abstract                                                                                                                                                                                                                                                                                                                                                                                 | 2                  |
|                           |        | (b) Provide in the abstract an informative and balanced summary of what was done and what was found                                                                                                                                                                                                                                                                                                                                                                    | 2                  |
| <b>Introduction</b>       |        |                                                                                                                                                                                                                                                                                                                                                                                                                                                                        |                    |
| Background/rationale      | 2      | Explain the scientific background and rationale for the investigation being reported                                                                                                                                                                                                                                                                                                                                                                                   | 4-5                |
| Objectives                | 3      | State specific objectives, including any pre-specified hypotheses                                                                                                                                                                                                                                                                                                                                                                                                      | 5                  |
| <b>Methods</b>            |        |                                                                                                                                                                                                                                                                                                                                                                                                                                                                        |                    |
| Study design              | 4      | Present key elements of study design early in the paper                                                                                                                                                                                                                                                                                                                                                                                                                | 5                  |
| Setting                   | 5      | Describe the setting, locations, and relevant dates, including periods of recruitment, exposure, follow-up, and data collection                                                                                                                                                                                                                                                                                                                                        | 5-6                |
| Participants              | 6      | (a) <i>Cohort study</i> —Give the eligibility criteria, and the sources and methods of selection of participants. Describe methods of follow-up<br><i>Case-control study</i> —Give the eligibility criteria, and the sources and methods of case ascertainment and control selection. Give the rationale for the choice of cases and controls<br><i>Cross-sectional study</i> —Give the eligibility criteria, and the sources and methods of selection of participants | 7                  |
|                           |        | (b) <i>Cohort study</i> —For matched studies, give matching criteria and number of exposed and unexposed<br><i>Case-control study</i> —For matched studies, give matching criteria and the number of controls per case                                                                                                                                                                                                                                                 |                    |
| Variables                 | 7      | Clearly define all outcomes, exposures, predictors, potential confounders, and effect modifiers. Give diagnostic criteria, if applicable                                                                                                                                                                                                                                                                                                                               | 6-7                |
| Data sources/ measurement | 8*     | For each variable of interest, give sources of data and details of methods of assessment (measurement). Describe comparability of assessment methods if there is more than one group                                                                                                                                                                                                                                                                                   | 7                  |
| Bias                      | 9      | Describe any efforts to address potential sources of bias                                                                                                                                                                                                                                                                                                                                                                                                              | 8                  |
| Study size                | 10     | Explain how the study size was arrived at                                                                                                                                                                                                                                                                                                                                                                                                                              | 7                  |
| Quantitative variables    | 11     | Explain how quantitative variables were handled in the analyses. If applicable, describe which groupings were chosen and why                                                                                                                                                                                                                                                                                                                                           | 8                  |
| Statistical methods       | 12     | (a) Describe all statistical methods, including those used to control for confounding                                                                                                                                                                                                                                                                                                                                                                                  | 8                  |
|                           |        | (b) Describe any methods used to examine subgroups and interactions                                                                                                                                                                                                                                                                                                                                                                                                    | NA                 |
|                           |        | (c) Explain how missing data were addressed                                                                                                                                                                                                                                                                                                                                                                                                                            | NA                 |
|                           |        | (d) <i>Cohort study</i> —If applicable, explain how loss to follow-up was addressed<br><i>Case-control study</i> —If applicable, explain how matching of cases and controls was addressed                                                                                                                                                                                                                                                                              | 8                  |

|                          |     |                                                                                                                                                                                                              |       |
|--------------------------|-----|--------------------------------------------------------------------------------------------------------------------------------------------------------------------------------------------------------------|-------|
|                          |     | <i>Cross-sectional study</i> —If applicable, describe analytical methods taking account of sampling strategy                                                                                                 |       |
|                          |     | (e) Describe any sensitivity analyses                                                                                                                                                                        | NA    |
| <b>Results</b>           |     |                                                                                                                                                                                                              |       |
| Participants             | 13* | (a) Report numbers of individuals at each stage of study—eg numbers potentially eligible, examined for eligibility, confirmed eligible, included in the study, completing follow-up, and analysed            | 8     |
|                          |     | (b) Give reasons for non-participation at each stage                                                                                                                                                         | 8     |
|                          |     | (c) Consider use of a flow diagram                                                                                                                                                                           |       |
| Descriptive data         | 14* | (a) Give characteristics of study participants (eg demographic, clinical, social) and information on exposures and potential confounders                                                                     | 8-9   |
|                          |     | (b) Indicate number of participants with missing data for each variable of interest                                                                                                                          | NA    |
|                          |     | (c) <i>Cohort study</i> —Summarise follow-up time (eg, average and total amount)                                                                                                                             | NA    |
| Outcome data             | 15* | <i>Cohort study</i> —Report numbers of outcome events or summary measures over time                                                                                                                          | NA    |
|                          |     | <i>Case-control study</i> —Report numbers in each exposure category, or summary measures of exposure                                                                                                         | NA    |
|                          |     | <i>Cross-sectional study</i> —Report numbers of outcome events or summary measures                                                                                                                           | 9     |
| Main results             | 16  | (a) Give unadjusted estimates and, if applicable, confounder-adjusted estimates and their precision (eg, 95% confidence interval). Make clear which confounders were adjusted for and why they were included | 10-11 |
|                          |     | (b) Report category boundaries when continuous variables were categorized                                                                                                                                    | NA    |
|                          |     | (c) If relevant, consider translating estimates of relative risk into absolute risk for a meaningful time period                                                                                             | NA    |
| Other analyses           | 17  | Report other analyses done—eg analyses of subgroups and interactions, and sensitivity analyses                                                                                                               | NA    |
| <b>Discussion</b>        |     |                                                                                                                                                                                                              |       |
| Key results              | 18  | Summarise key results with reference to study objectives                                                                                                                                                     | 11-12 |
| Limitations              | 19  | Discuss limitations of the study, taking into account sources of potential bias or imprecision. Discuss both direction and magnitude of any potential bias                                                   | 13    |
| Interpretation           | 20  | Give a cautious overall interpretation of results considering objectives, limitations, multiplicity of analyses, results from similar studies, and other relevant evidence                                   | 13    |
| Generalisability         | 21  | Discuss the generalisability (external validity) of the study results                                                                                                                                        | 13-14 |
| <b>Other information</b> |     |                                                                                                                                                                                                              |       |
| Funding                  | 22  | Give the source of funding and the role of the funders for the present study and, if applicable, for the original study on which the present article is based                                                | 14    |

\*Give information separately for cases and controls in case-control studies and, if applicable, for exposed and unexposed groups in cohort and cross-sectional studies.

**Note:** An Explanation and Elaboration article discusses each checklist item and gives methodological background and published examples of transparent reporting. The STROBE checklist is best used in conjunction with this article (freely available on the Web sites of PLoS Medicine at <http://www.plosmedicine.org/>, Annals of Internal Medicine at <http://www.annals.org/>, and Epidemiology at <http://www.epidem.com/>). Information on the STROBE Initiative is available at [www.strobe-statement.org](http://www.strobe-statement.org).
