# Supplementary material for: Prevalence and predictors of gestational diabetes mellitus in rural Assam: a cross-sectional study using mobile medical units
Source: PubMed Central journal article supplement — BMJ Open. 2020 Nov 10;10(11):e037836. doi: 10.1136/bmjopen-2020-037836 (PMC7656912; doi:10.1136/bmjopen-2020-037836), 2020-11-10
Supplement: bmjopen-2020-037836supp001.pdf [file bmjopen-2020-037836supp001.pdf]

## Annexure 1

## Survey Questionnaire for GDM

| SI No. | GDM Survey Tool                                               |                                                        |
|--------|---------------------------------------------------------------|--------------------------------------------------------|
| 1      | Name of Pregnant woman                                        |                                                        |
| 2      | Name of Husband                                               |                                                        |
| 3      | Age (in Yrs)                                                  | [       ]                                              |
| 4      | District                                                      | [       ]                                              |
| 5      | Block                                                         | [       ]                                              |
| 6      | Village                                                       | [       ]                                              |
| 7      | Religion                                                      | [1] Hindu<br>[2] Muslim<br>[3] Christian<br>[4] Others |
| 8      | Education (Highest qualification)                             | [       ]                                              |
| 9      | Do you consume alcohol?                                       | [Yes/No]                                               |
| 10     | Do you chew or smoke tobacco?                                 | [Yes/No]                                               |
| 11     | Number of ANC's done                                          | [Number]                                               |
| 12     | Whom do you contact during your illness?                      | [HF/doctor/Quack]                                      |
| 13     | Are you consulting any doctor for your regular checkup?       | [Yes/No]                                               |
| 14     | if yes, is the doctor a specialist (O & G)?                   |                                                        |
| 15     | where do you want to have delivery?                           | [Home/Hospital]                                        |
| 16     | Gestation (completed weeks of pregnancy)                      | [       ]                                              |
| 17     | Last Menstrual Period (LMP)                                   | [DD-MM-YY]                                             |
| 18     | Expected Date of Delivery(EDD)                                | [DD-MM-YY]                                             |
| 19     | MCTS ID                                                       | [ID number]                                            |
| 20     | Gravida                                                       | [No. of times pregnant]                                |
| 21     | Parity No.                                                    | [Primi/multipara]                                      |
| 22     | No. of children                                               | [Number]                                               |
| 23     | Order of pregnancy                                            | [Number]                                               |
| 24     | Have you had a stillborn or previous spontaneous miscarriage? | [Yes/No/Don't Know]                                    |
| 25     | Blood Pressure                                                | [Systolic/Diastolic in mm Hg]                          |
| 26     | Height (in metres)                                            | [       ]                                              |
| 27     | Weight (in Kg)                                                | [       ]                                              |
| 28     | BMI (Kg/m <sup>2</sup> )                                      | [       ]                                              |
| 29     | Waist Circumference (in Inches)                               | [       ]                                              |
| 30     | Are you suffering from diabetes(pre-existing)?                | [Yes/No/Don't Know]                                    |

|    |                                                                                 |                     |
|----|---------------------------------------------------------------------------------|---------------------|
| 31 | <b>Do you have family history of type 2 diabetes (parents/brothers/sisters)</b> | [Yes/No/Don't Know] |
| 32 | <b>Have you had diabetes in previous pregnancy?</b>                             | [Yes/No/Don't Know] |
| 33 | <b>Have you had high blood pressure in previous pregnancy?</b>                  | [Yes/No/Don't Know] |
| 34 | <b>Blood sugar level (before OGTT) in mg/dl</b>                                 | [            ]      |
| 35 | <b>Taken 75 gm of glucose</b>                                                   | [Yes/No]            |
| 36 | <b>Blood sugar at 2 hr after taking 75 grams glucose (in mg/dl)</b>             | [            ]      |
| 37 | <b>Suspected Gestational diabetes mellitus</b>                                  | [Yes/No]            |
